# Supplementary material
Source: publisher figshare collection journal article supplement (https://acs.figshare.com/ndownloader/files/17670854)

***N-Morpholinomethyl-5-lithiotetrazole: A Reagent for the  
One-Pot Synthesis of 5-(1-Hydroxyalkyl)tetrazoles***

*Panagiotis D. Alexakos and Duncan J. Wardrop\**

Department of Chemistry, University of Illinois at Chicago,  
845 West Taylor Street, Chicago, IL 60607

***Supporting Information***

Table of Contents

|    |                                                                                       |      |
|----|---------------------------------------------------------------------------------------|------|
| I. | $^1\text{H}$ and $^{13}\text{C}\{^1\text{H}\}$ NMR spectra for all compounds reported | SI-2 |
|----|---------------------------------------------------------------------------------------|------|

\* Corresponding author:  
Tel: 312-355-1035  
Fax: 312-996-0431  
E-mail: [wardropd@uic.edu](mailto:wardropd@uic.edu)

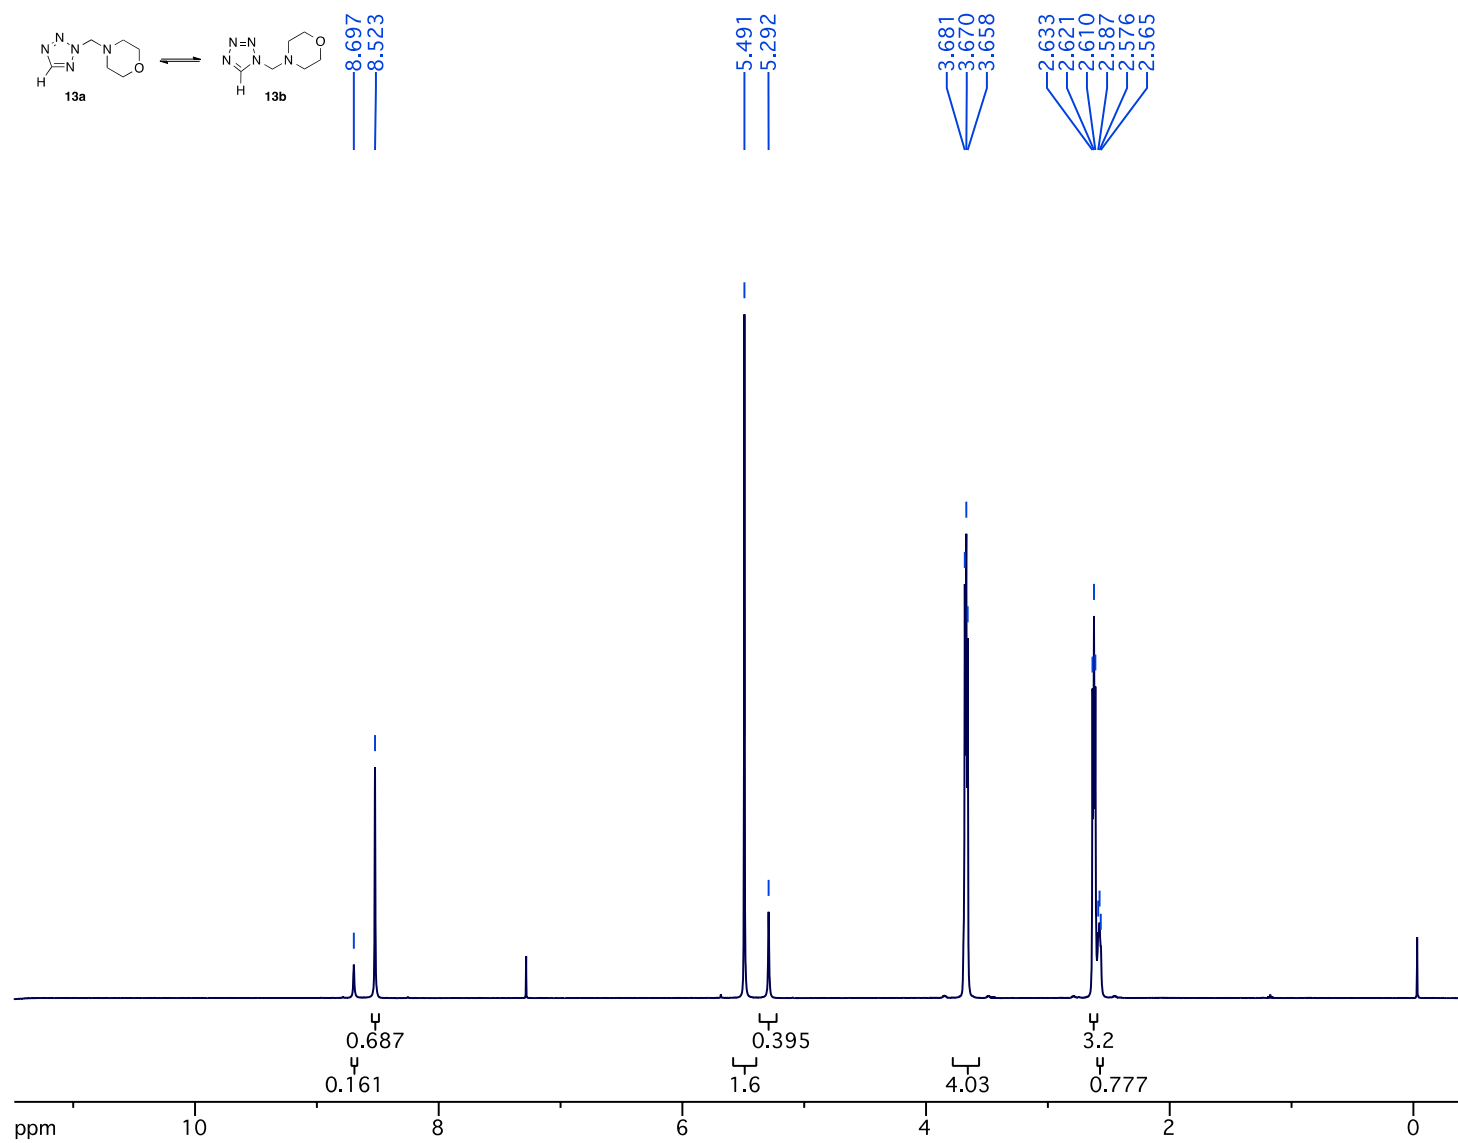

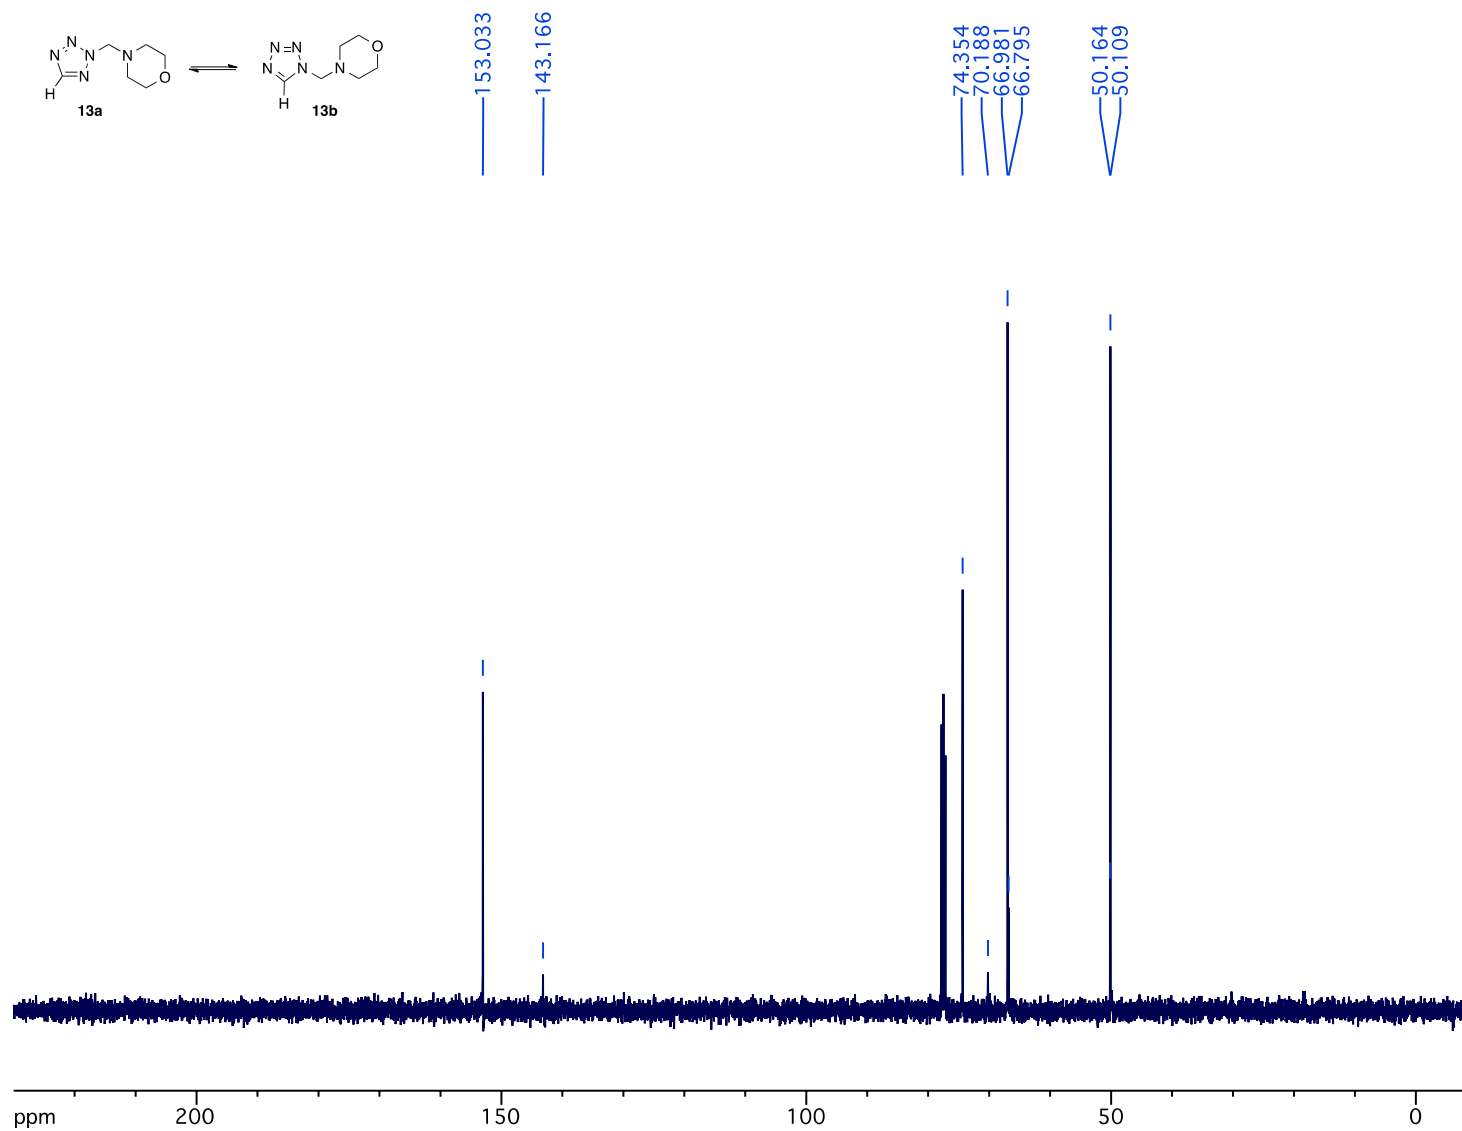

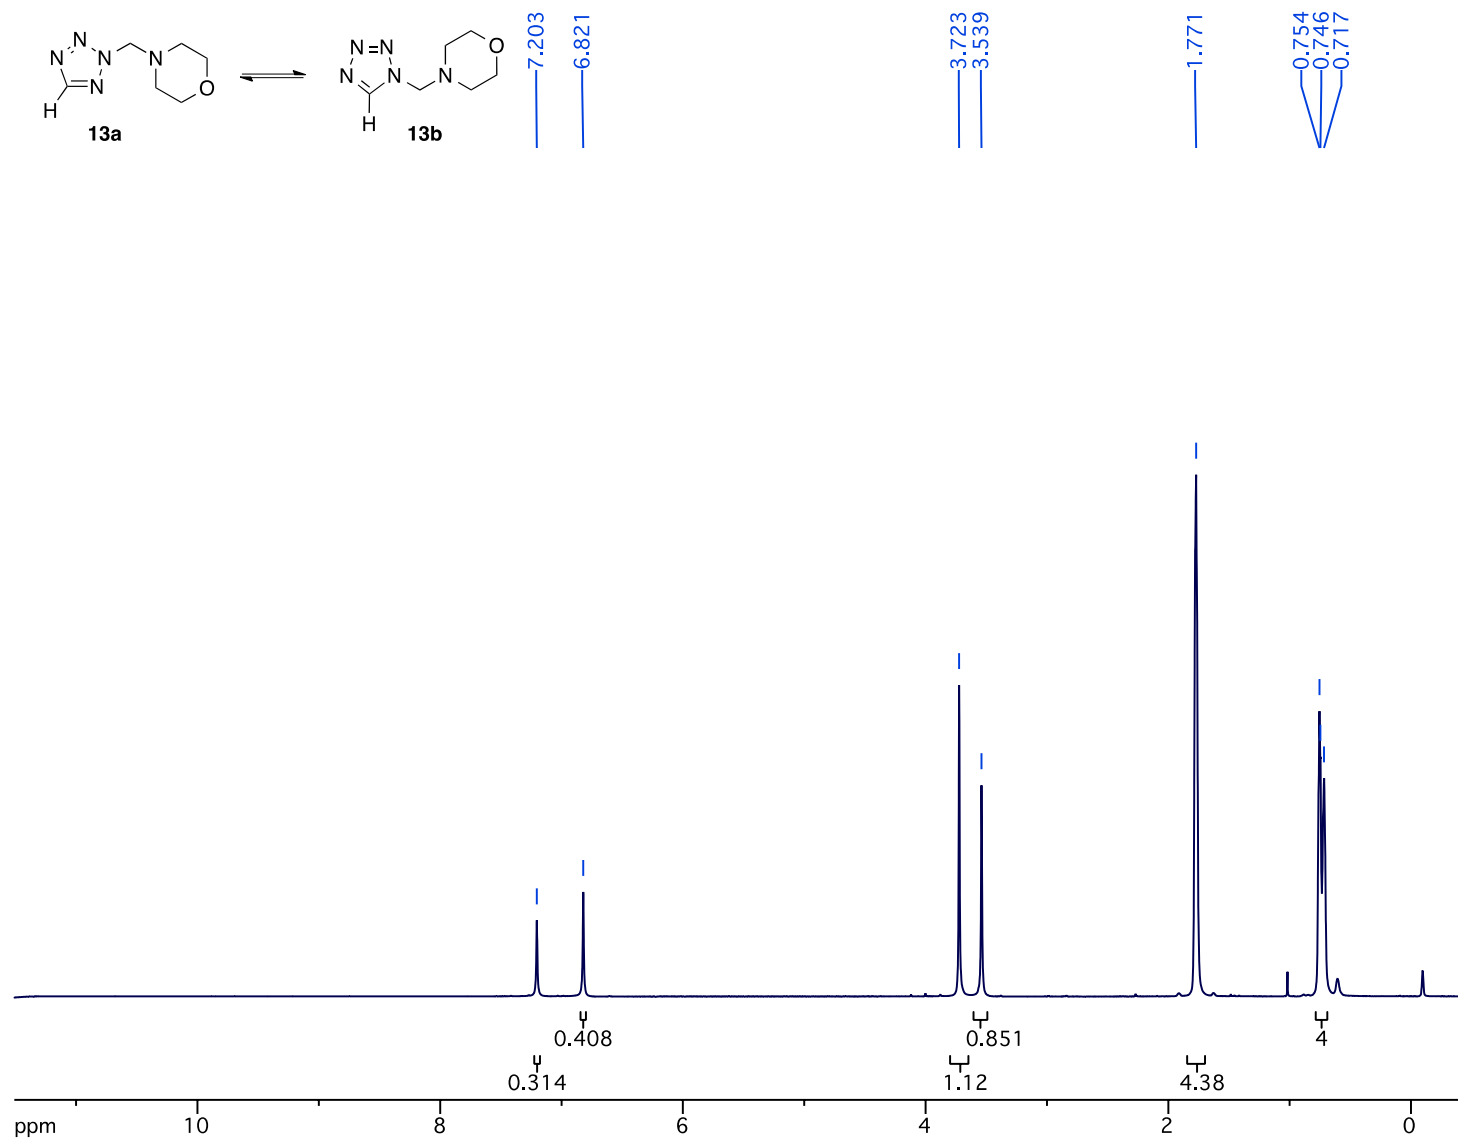

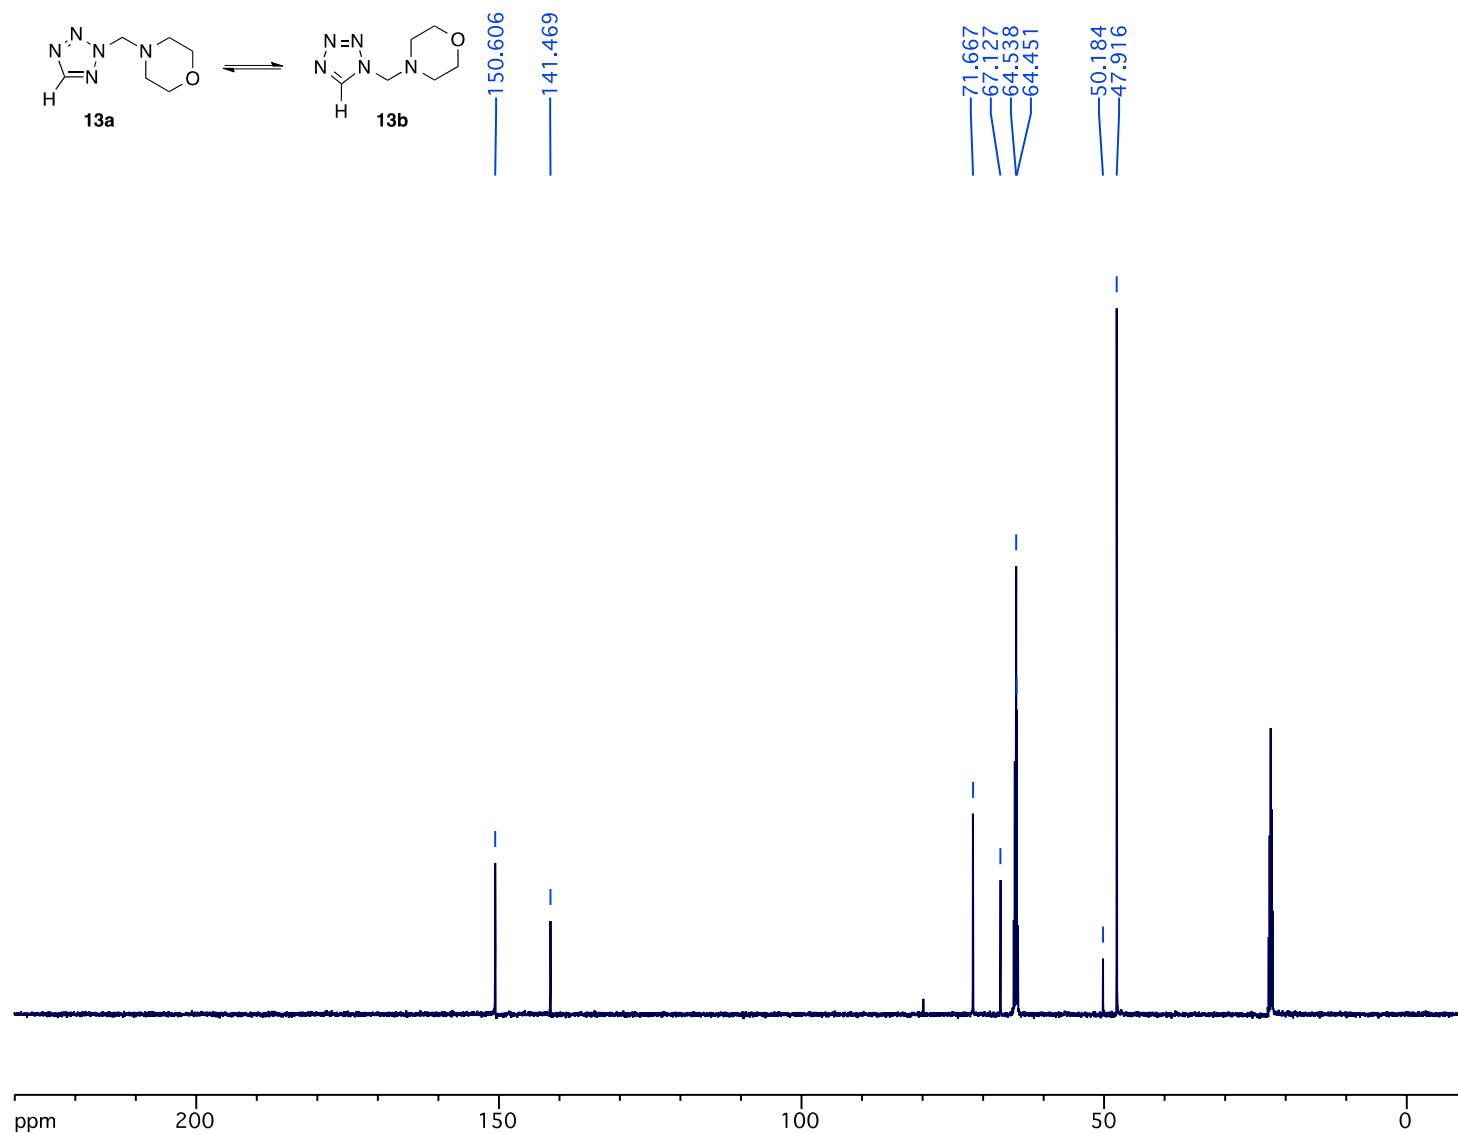

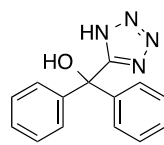**16a**

7.424  
7.407  
7.370  
7.354  
7.335  
7.317

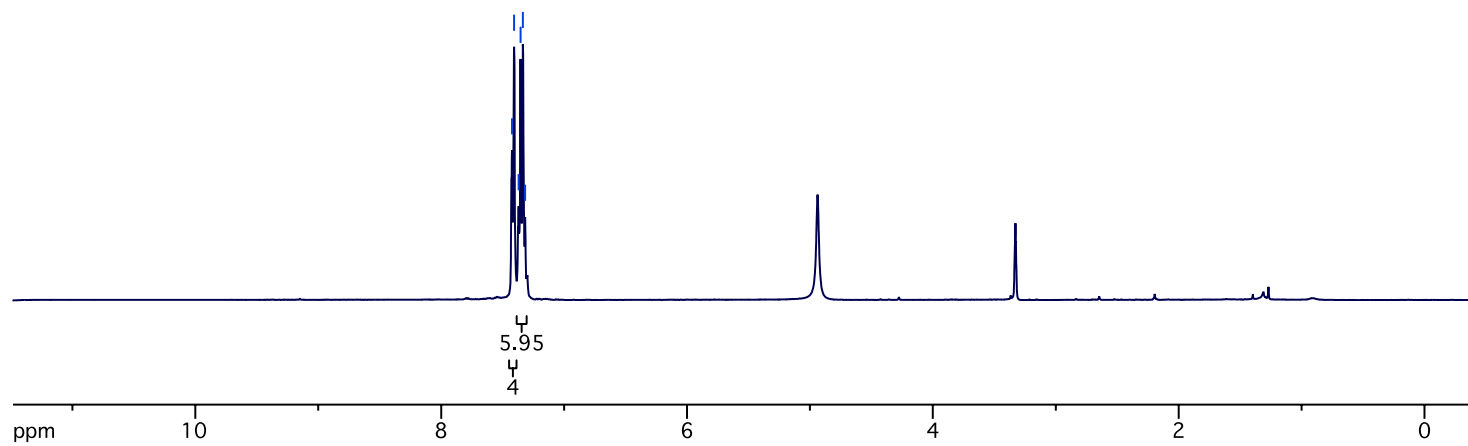

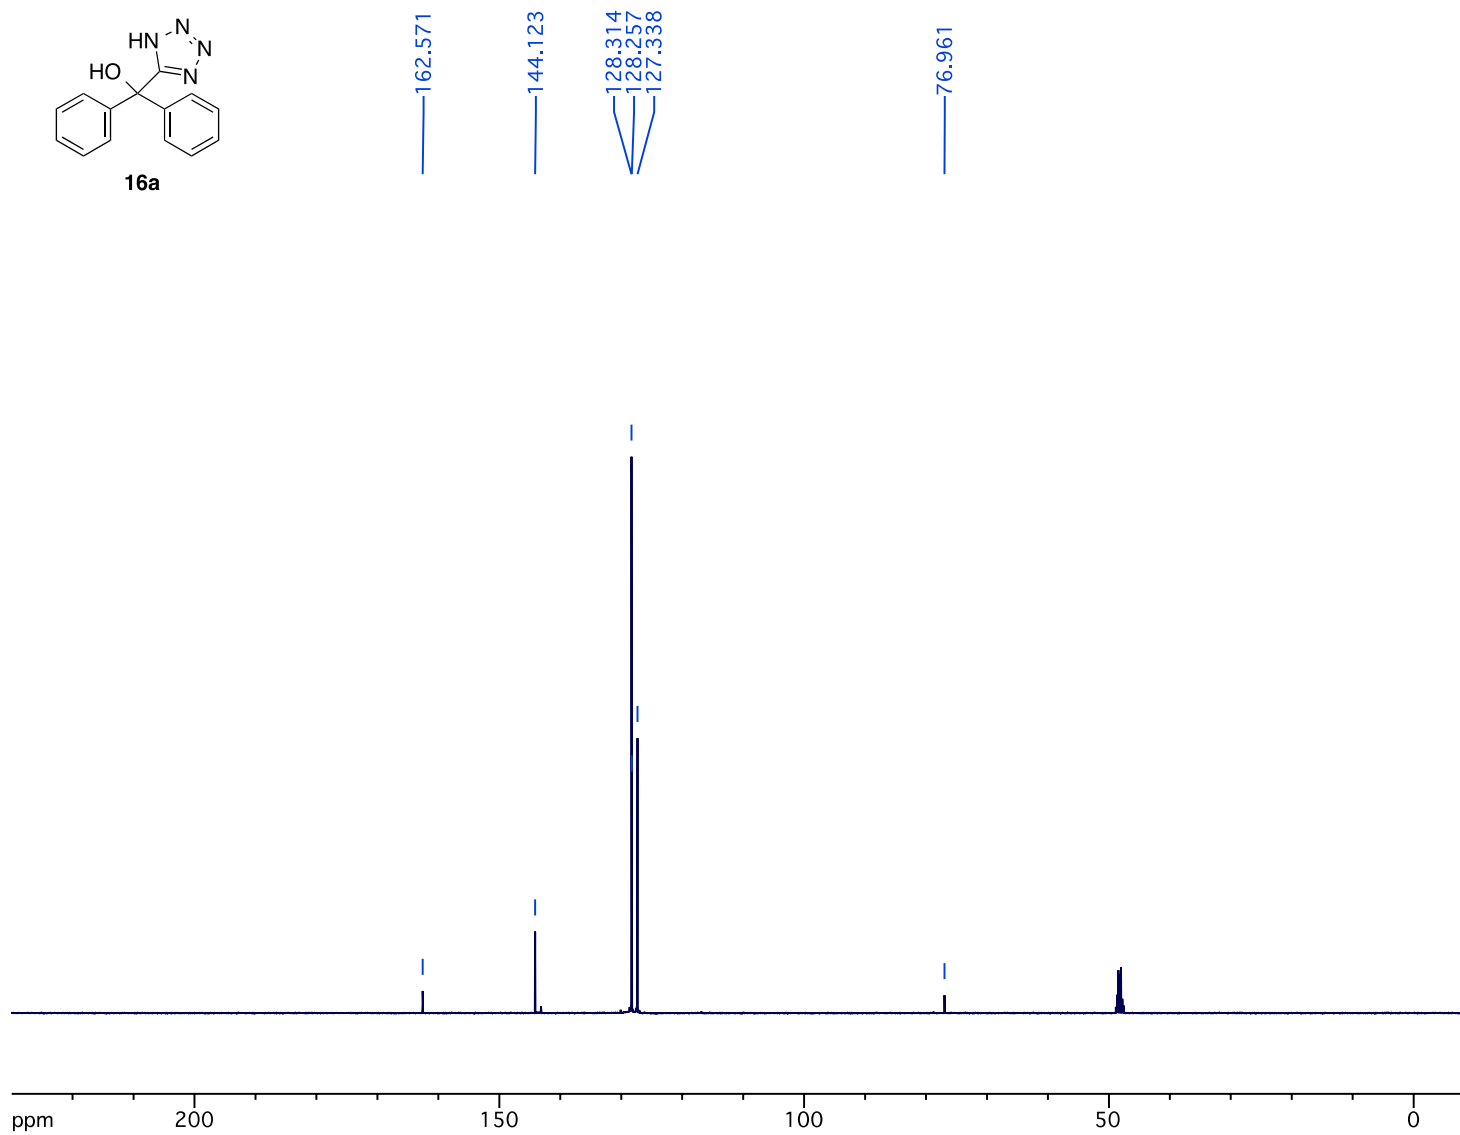

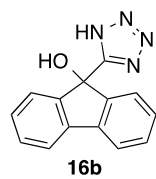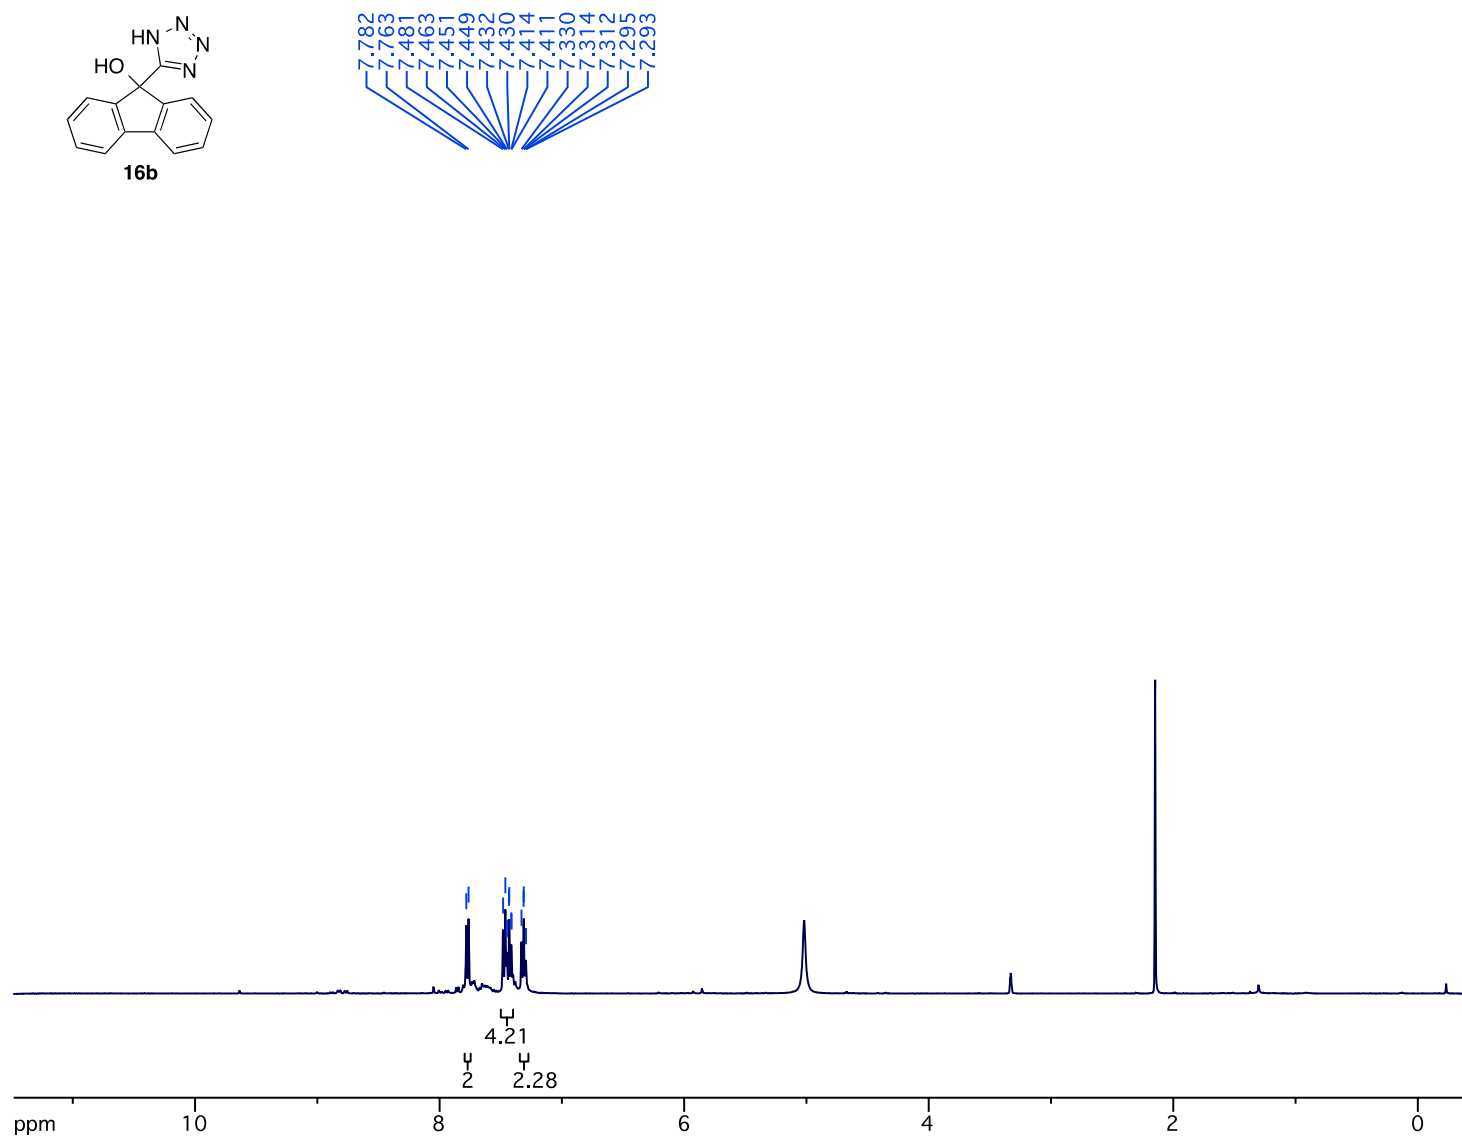



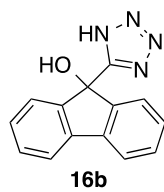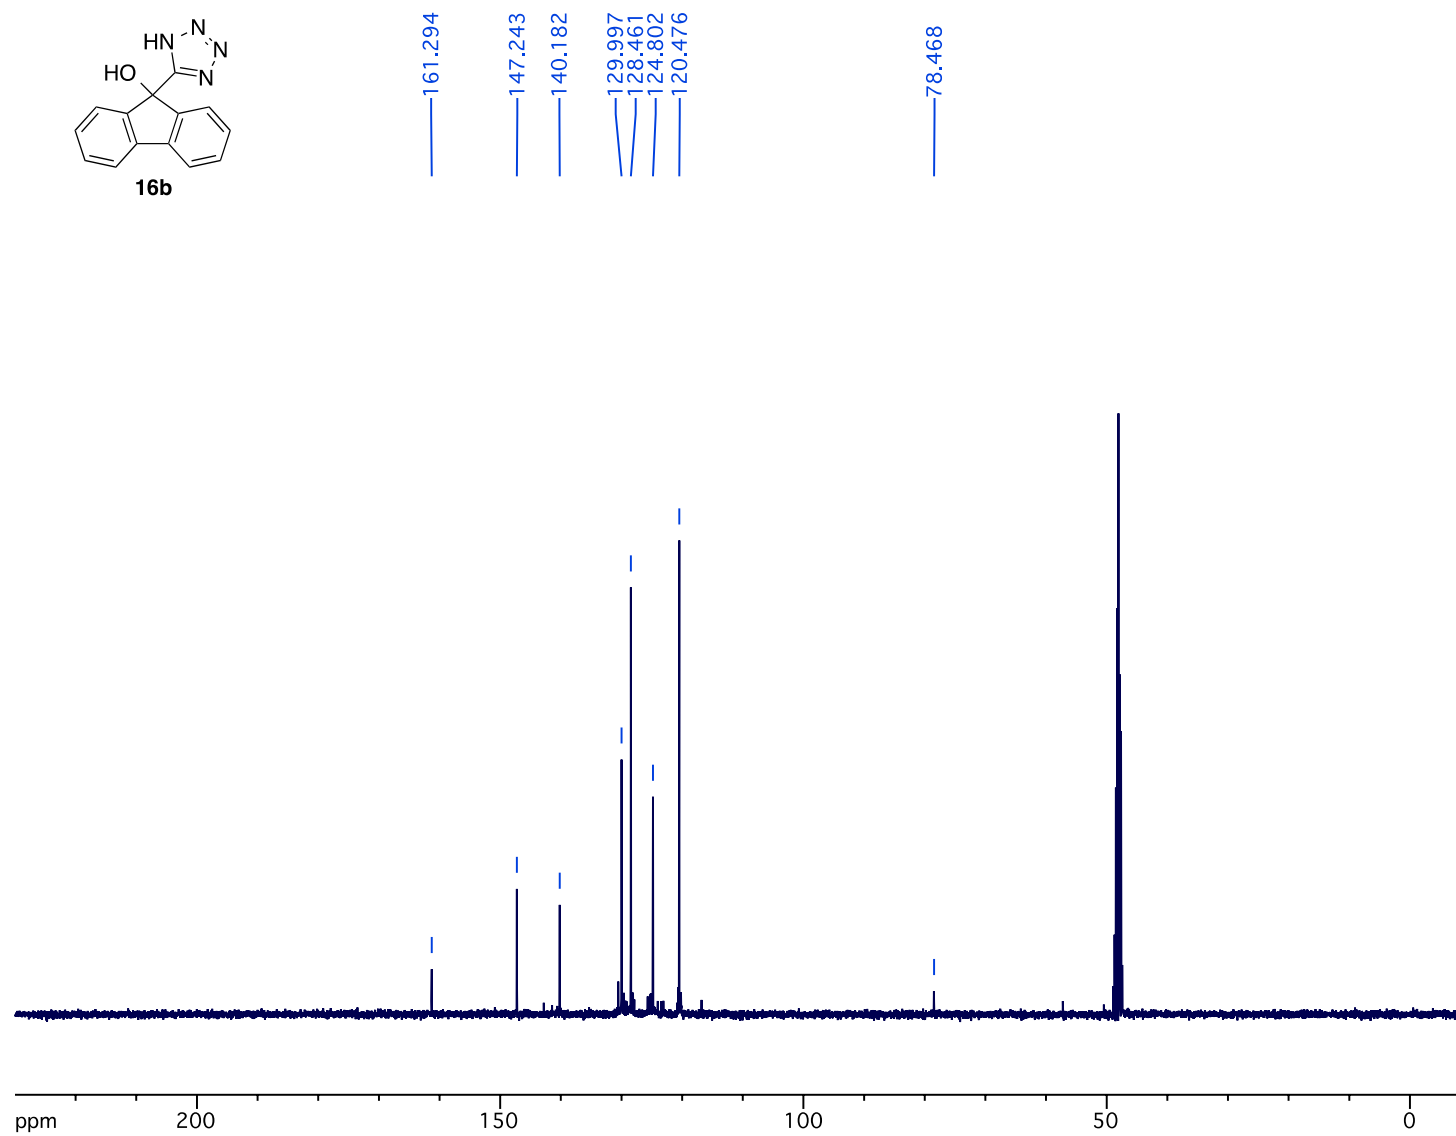

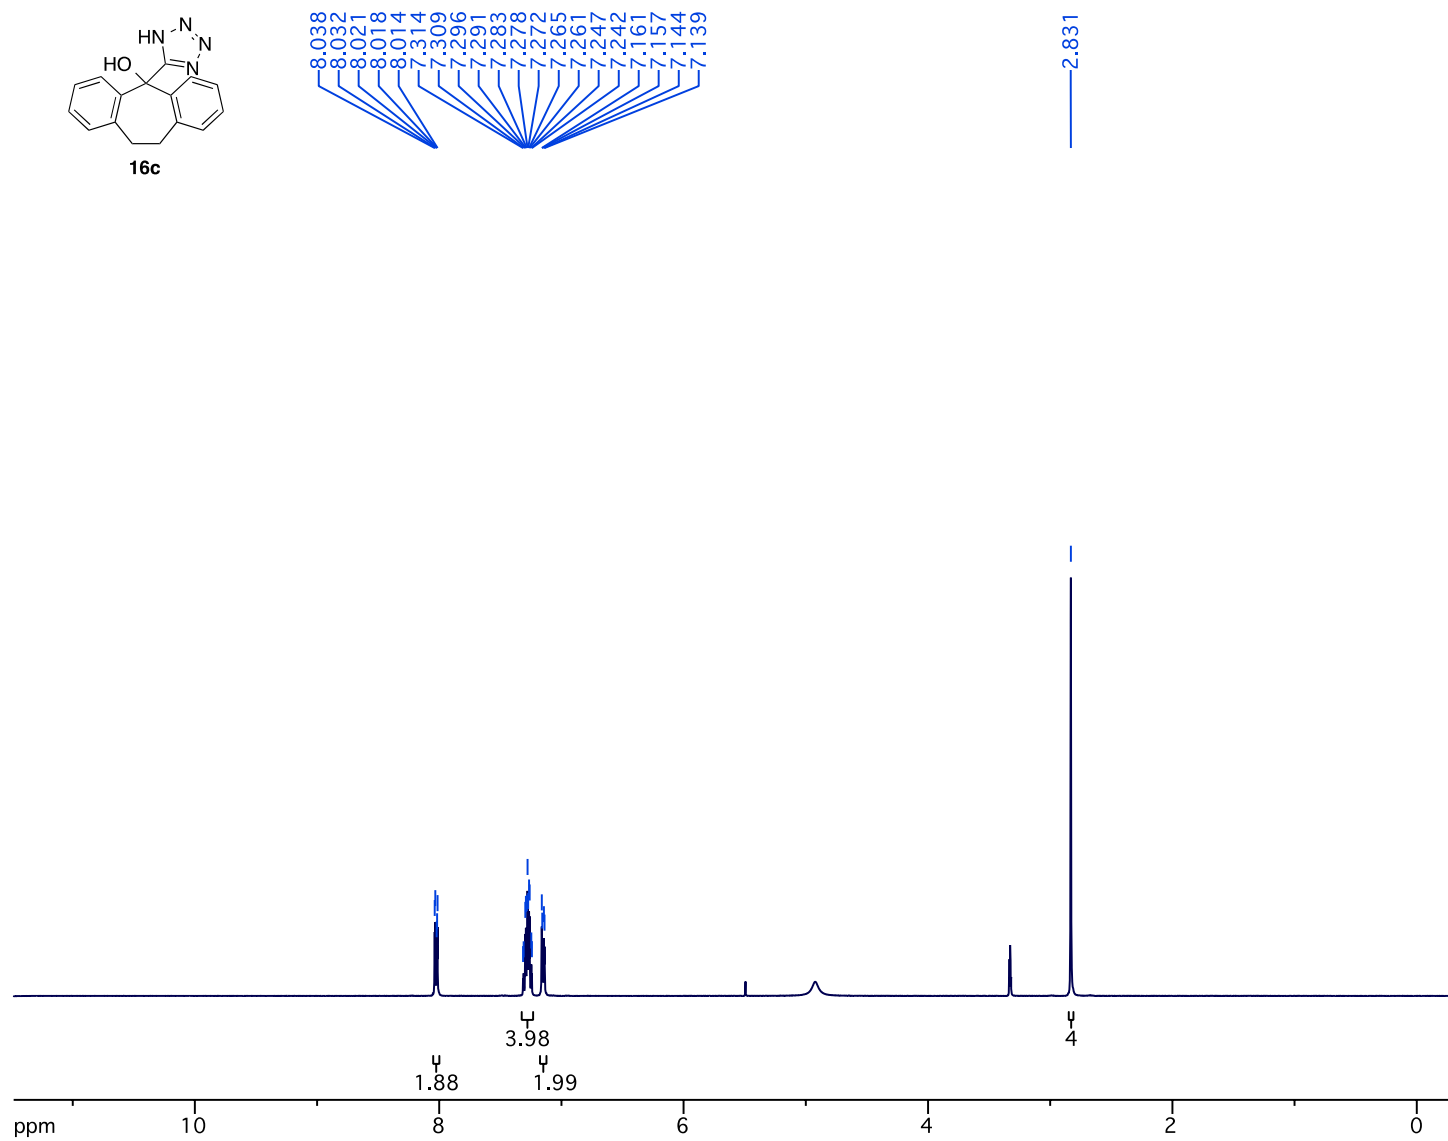

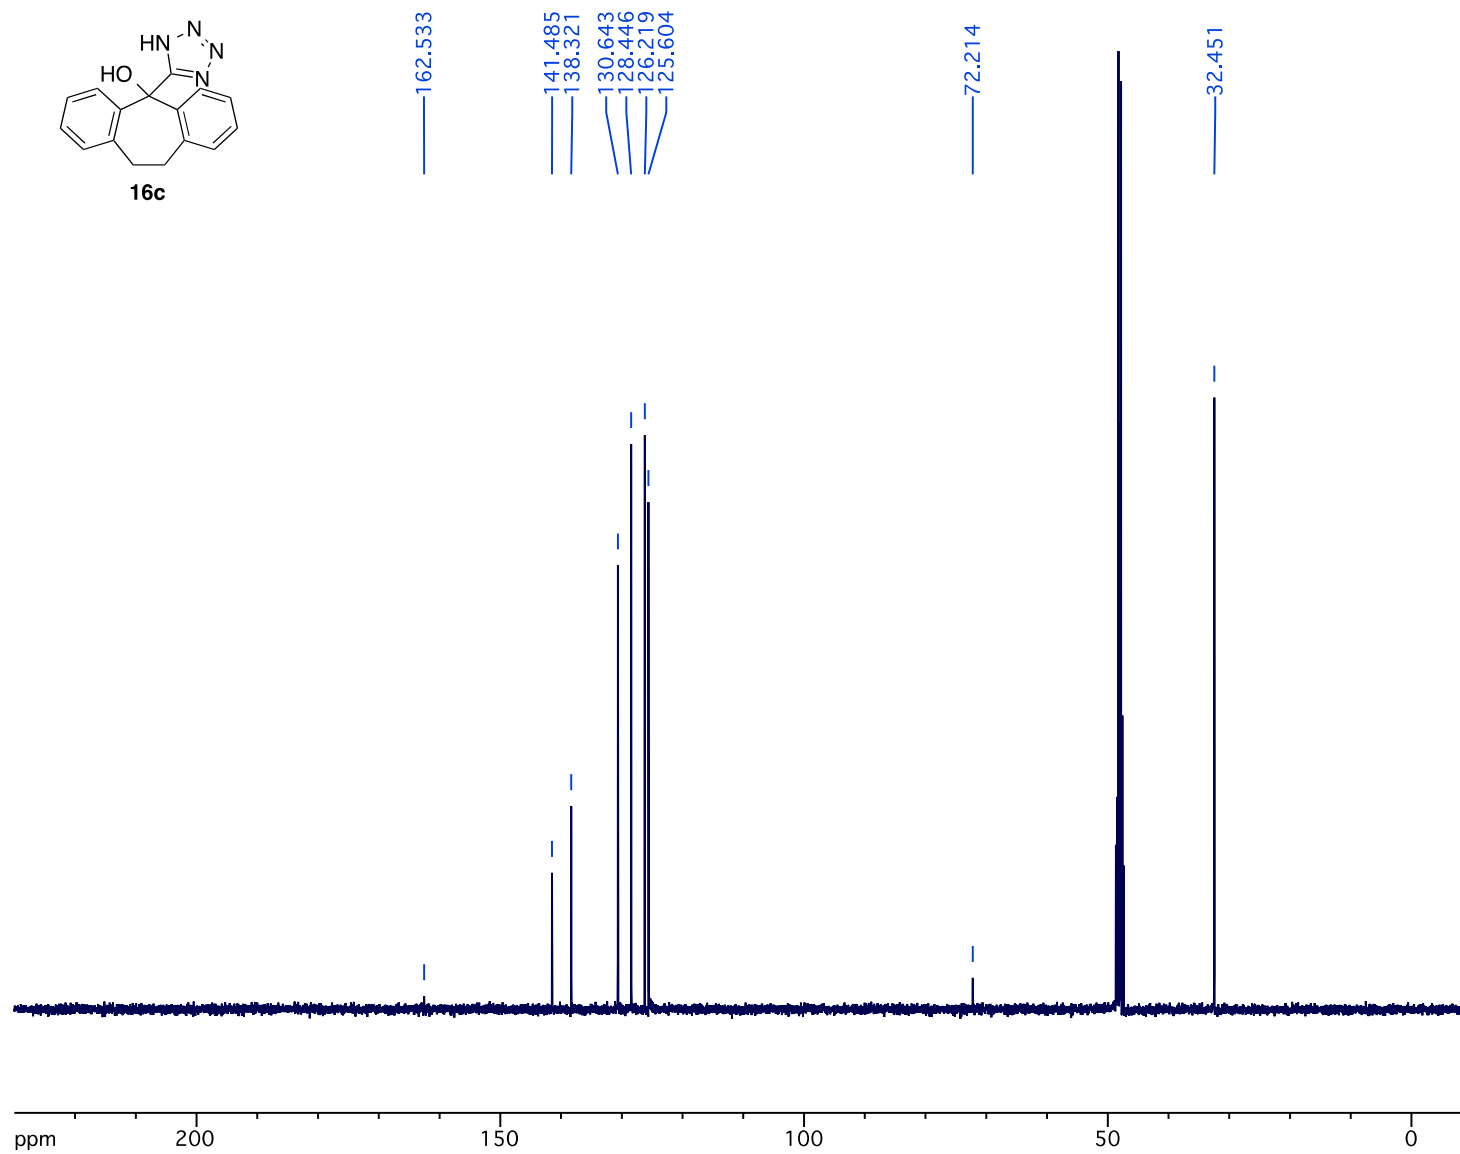

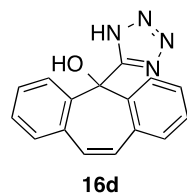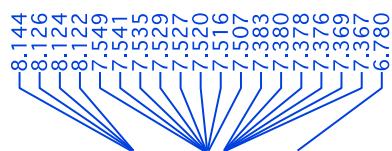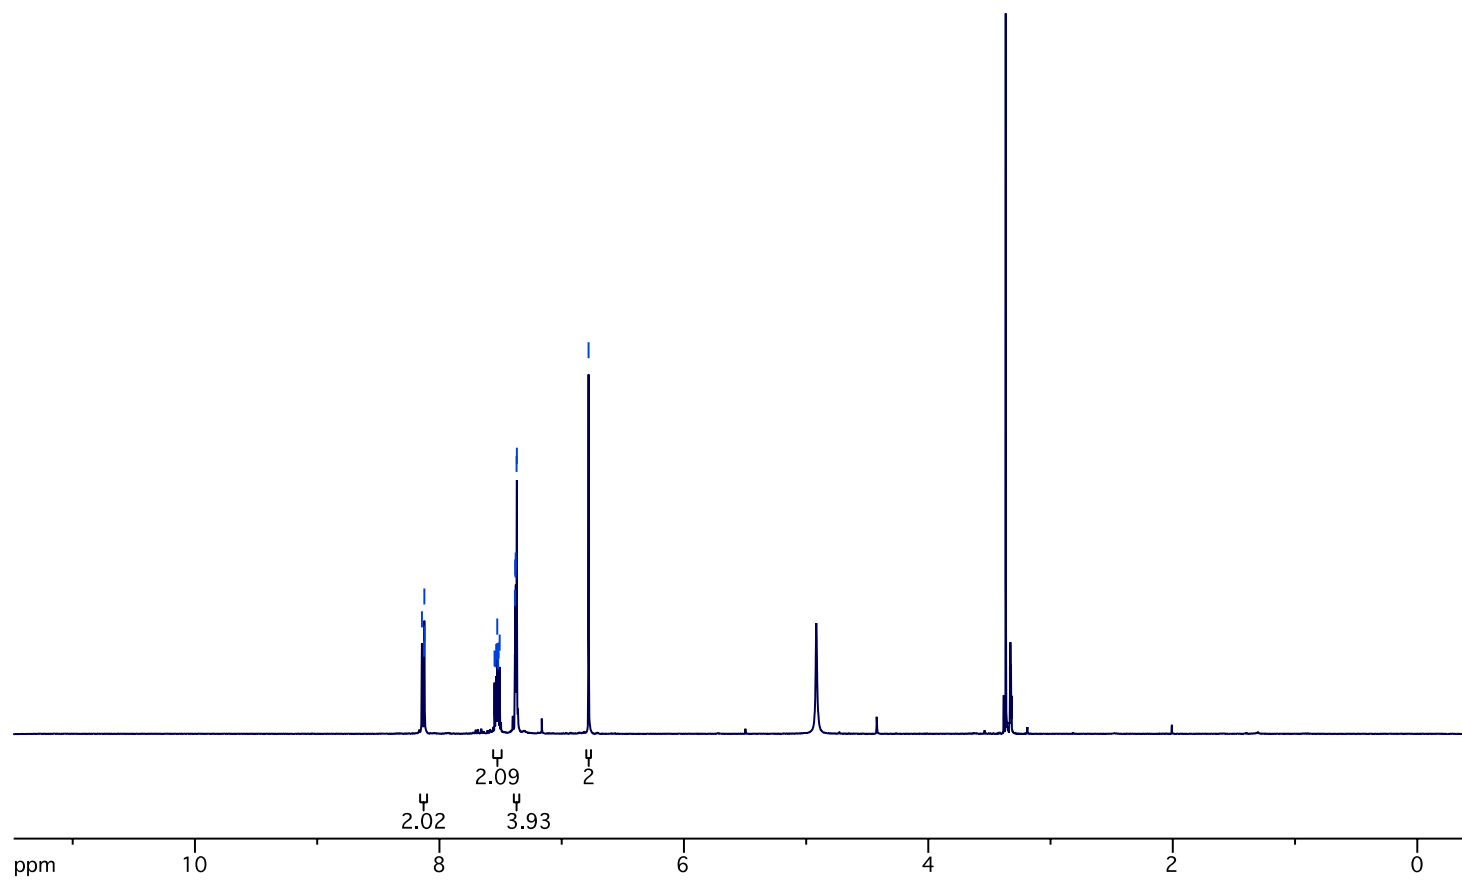

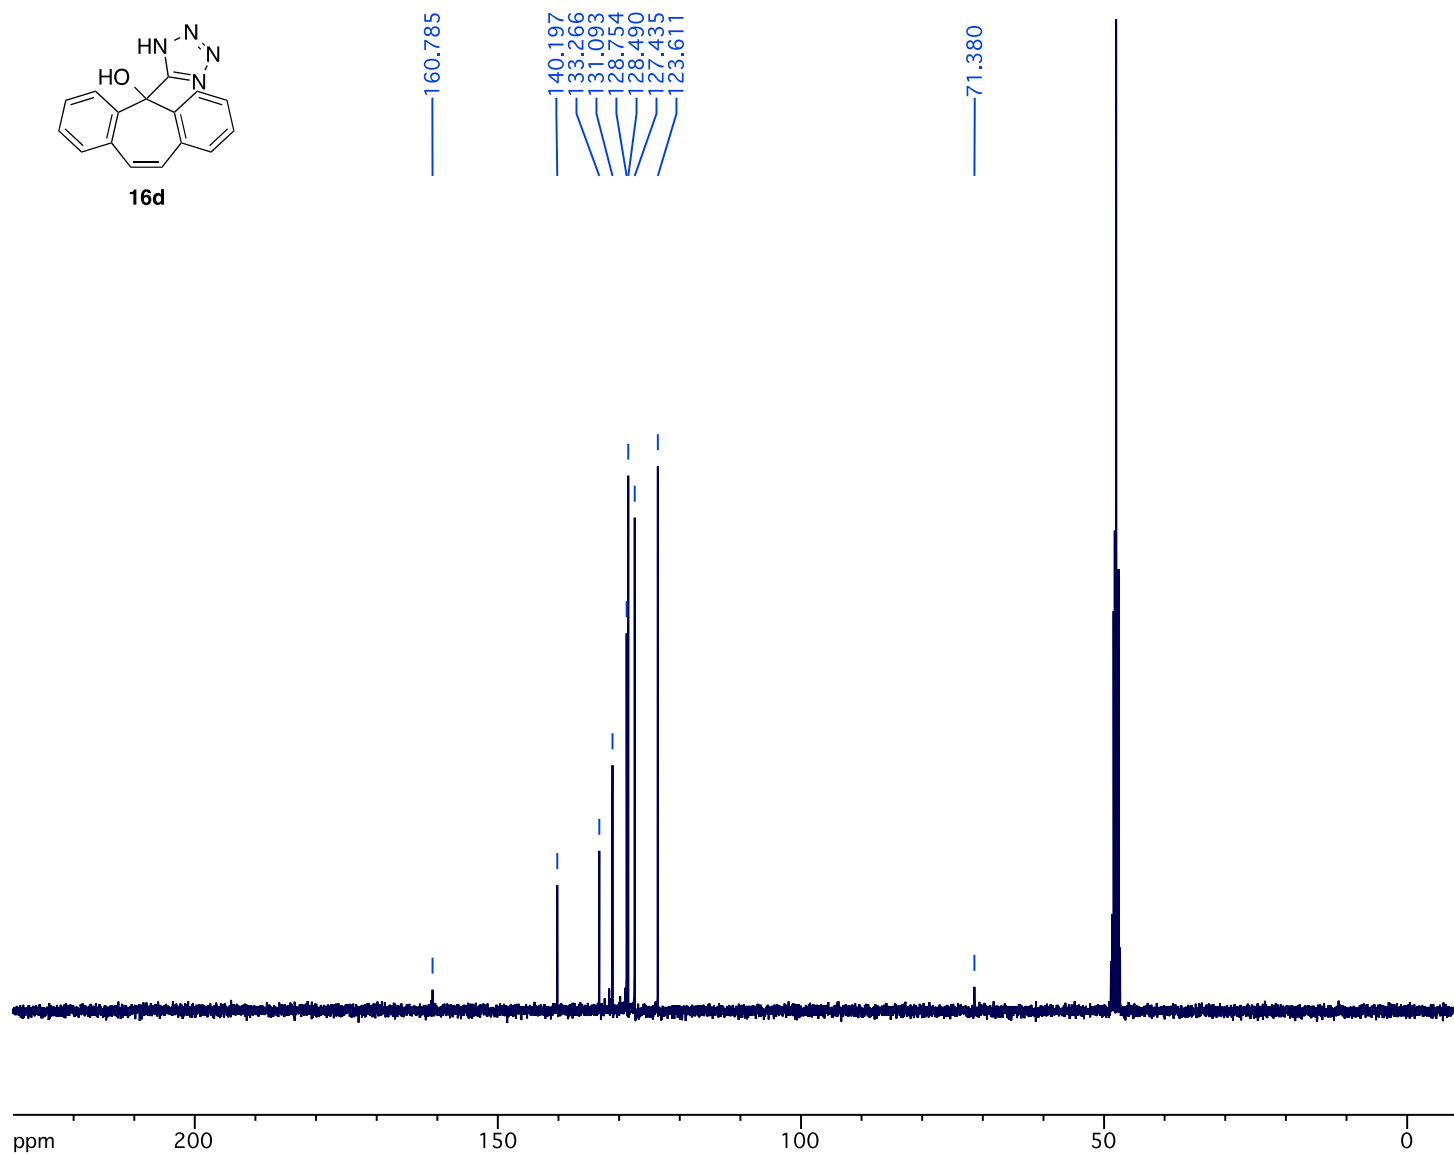

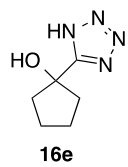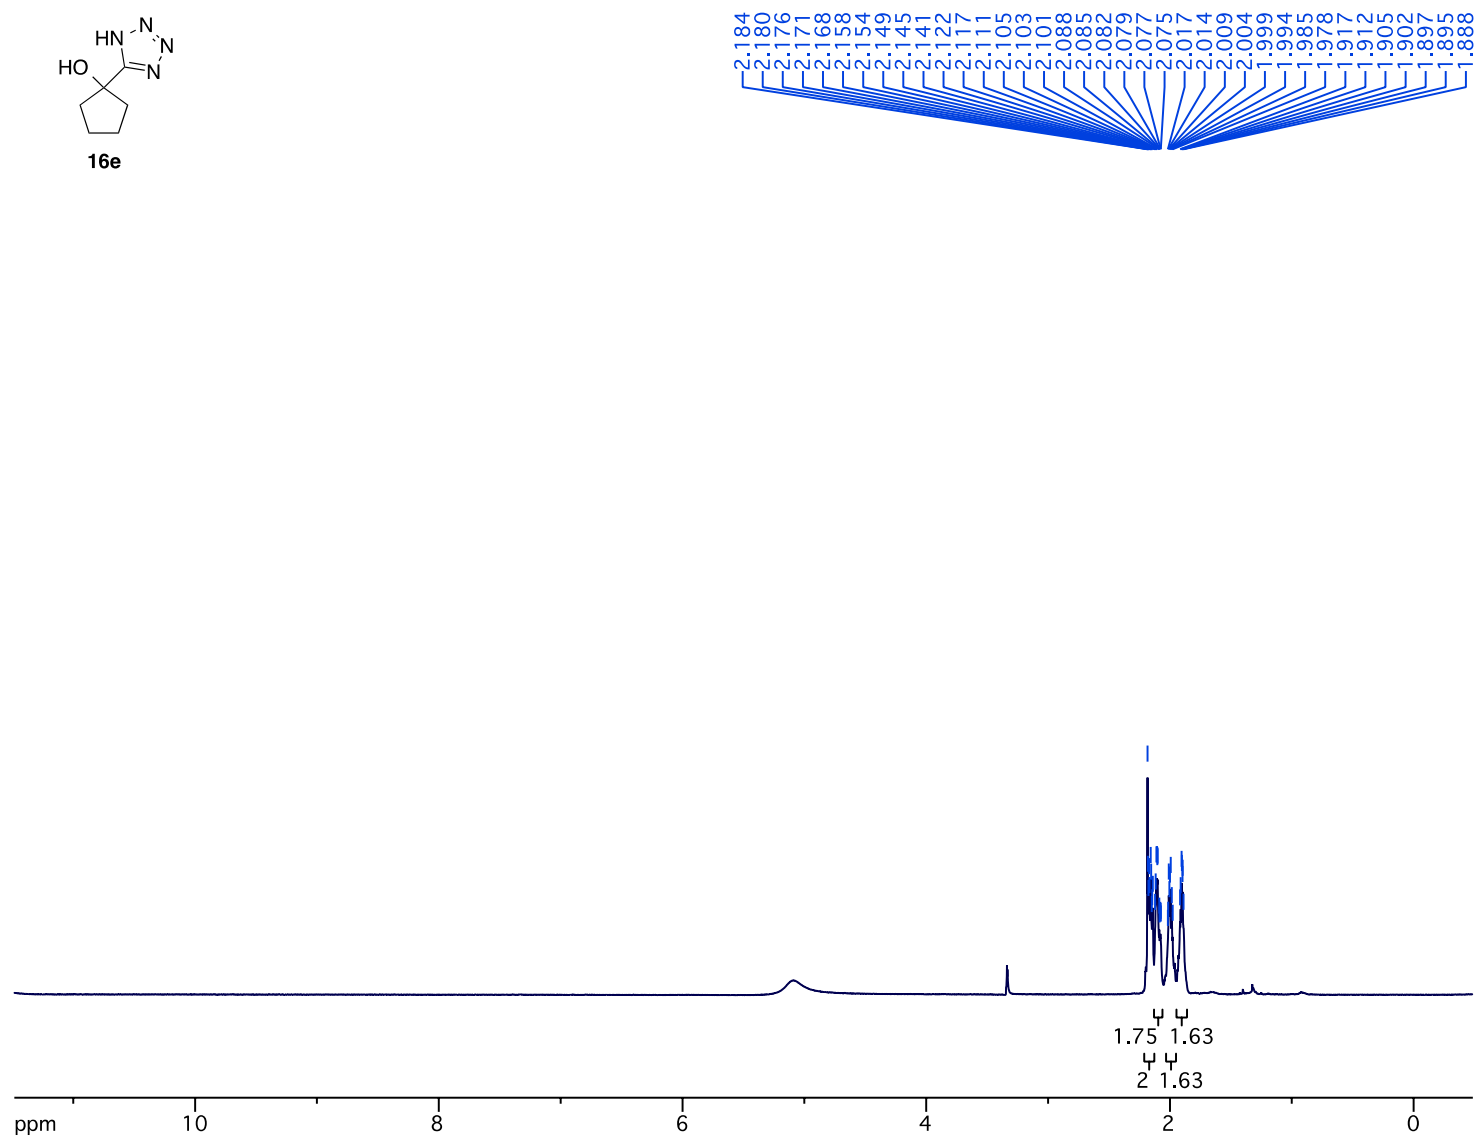

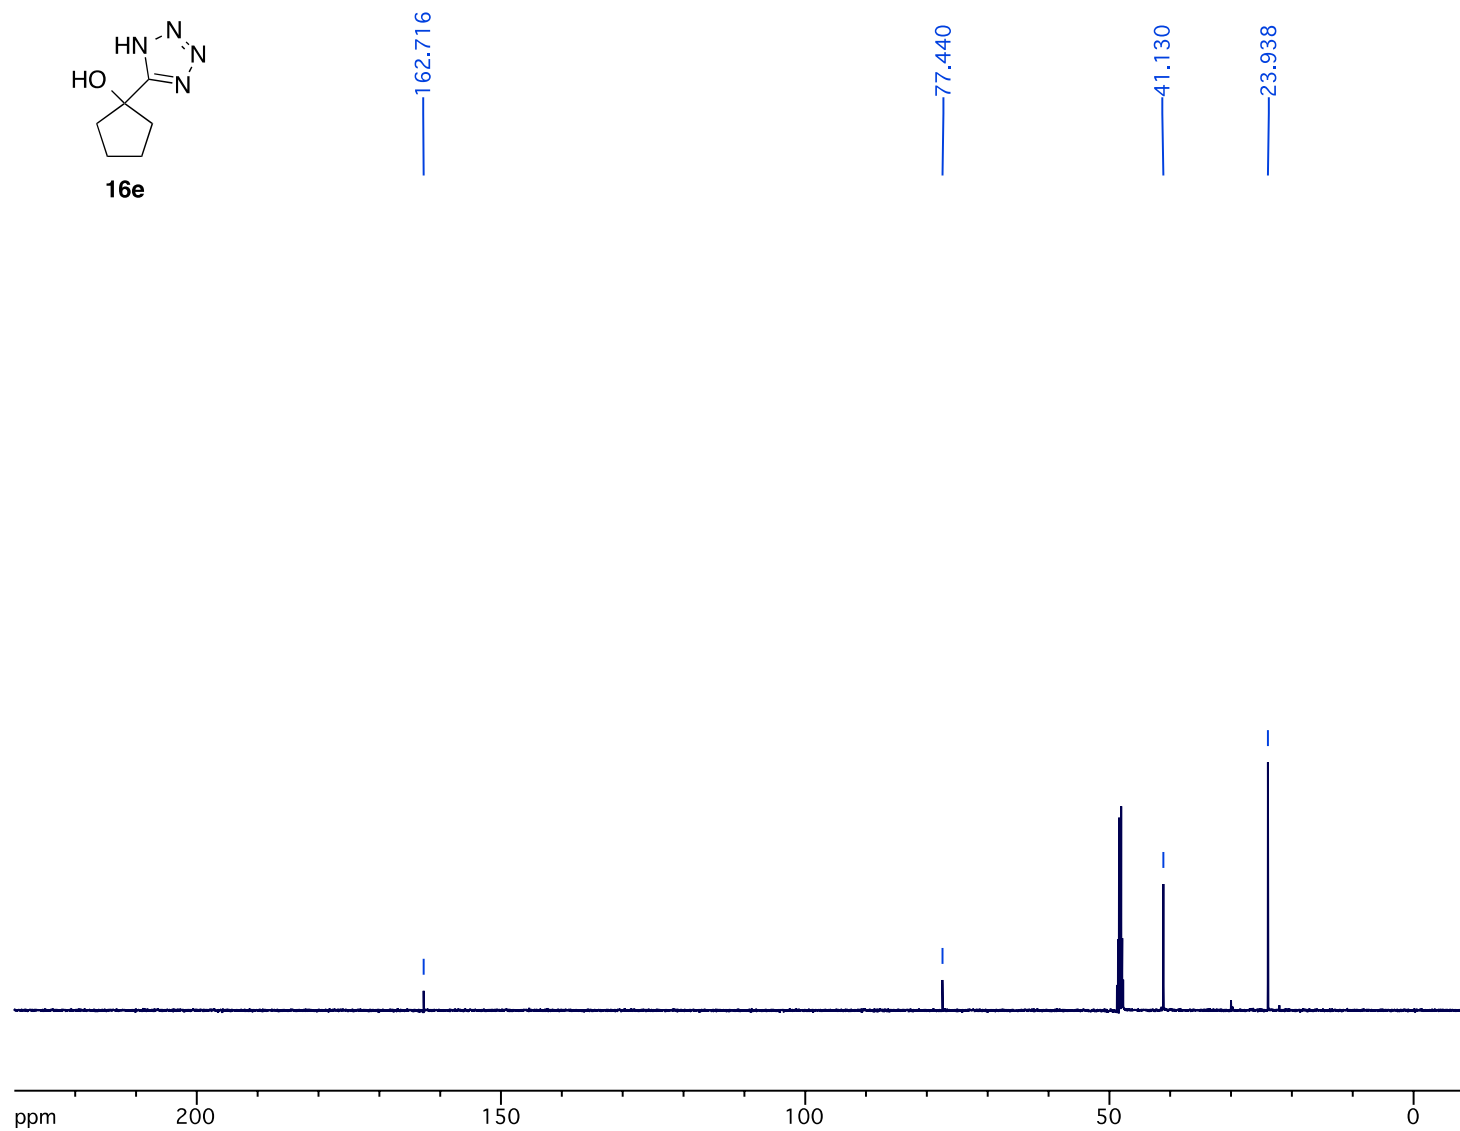

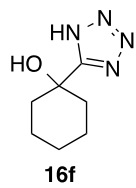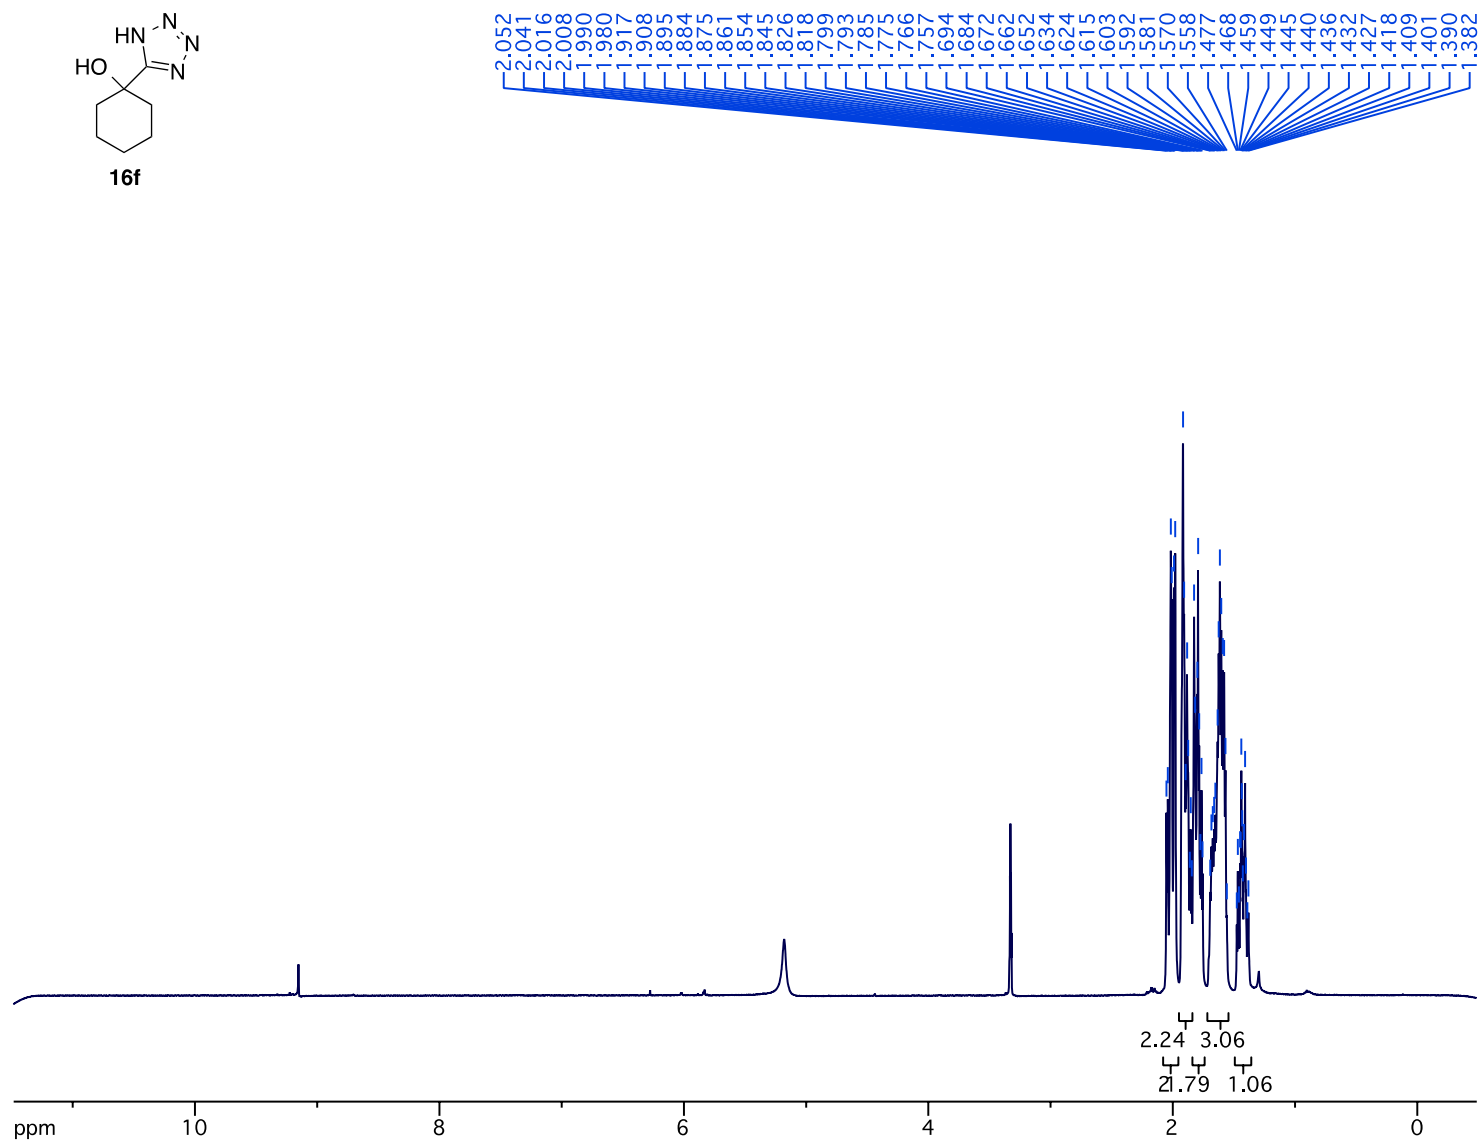



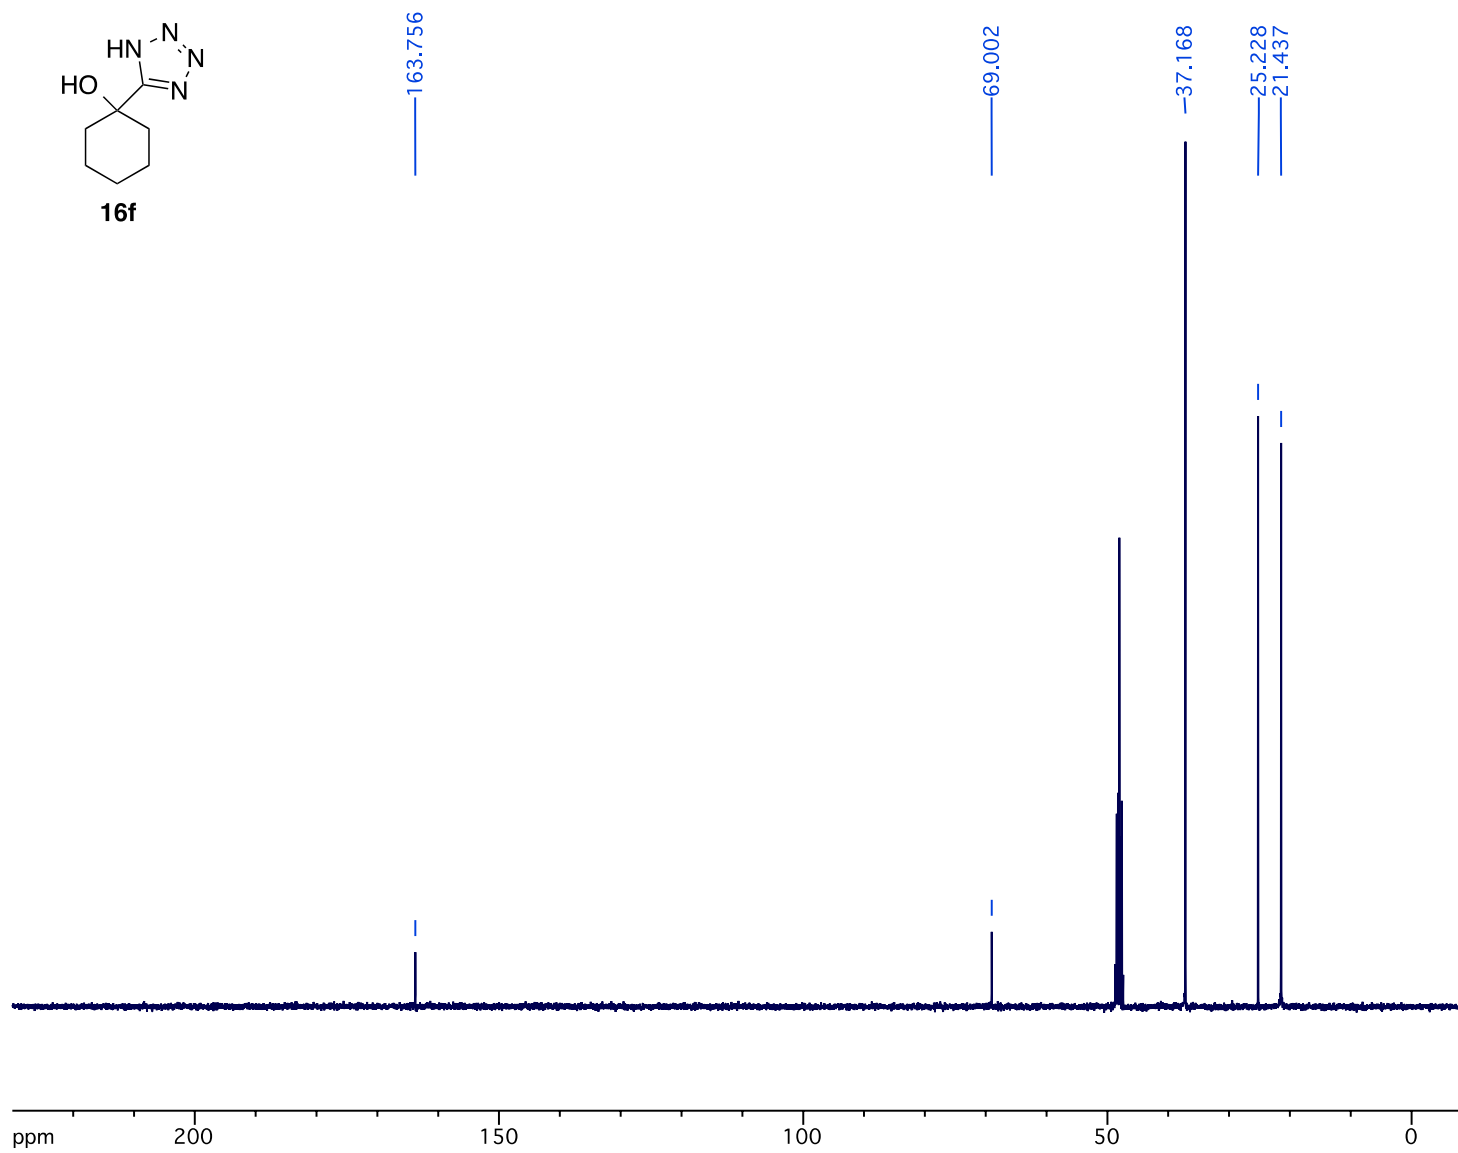

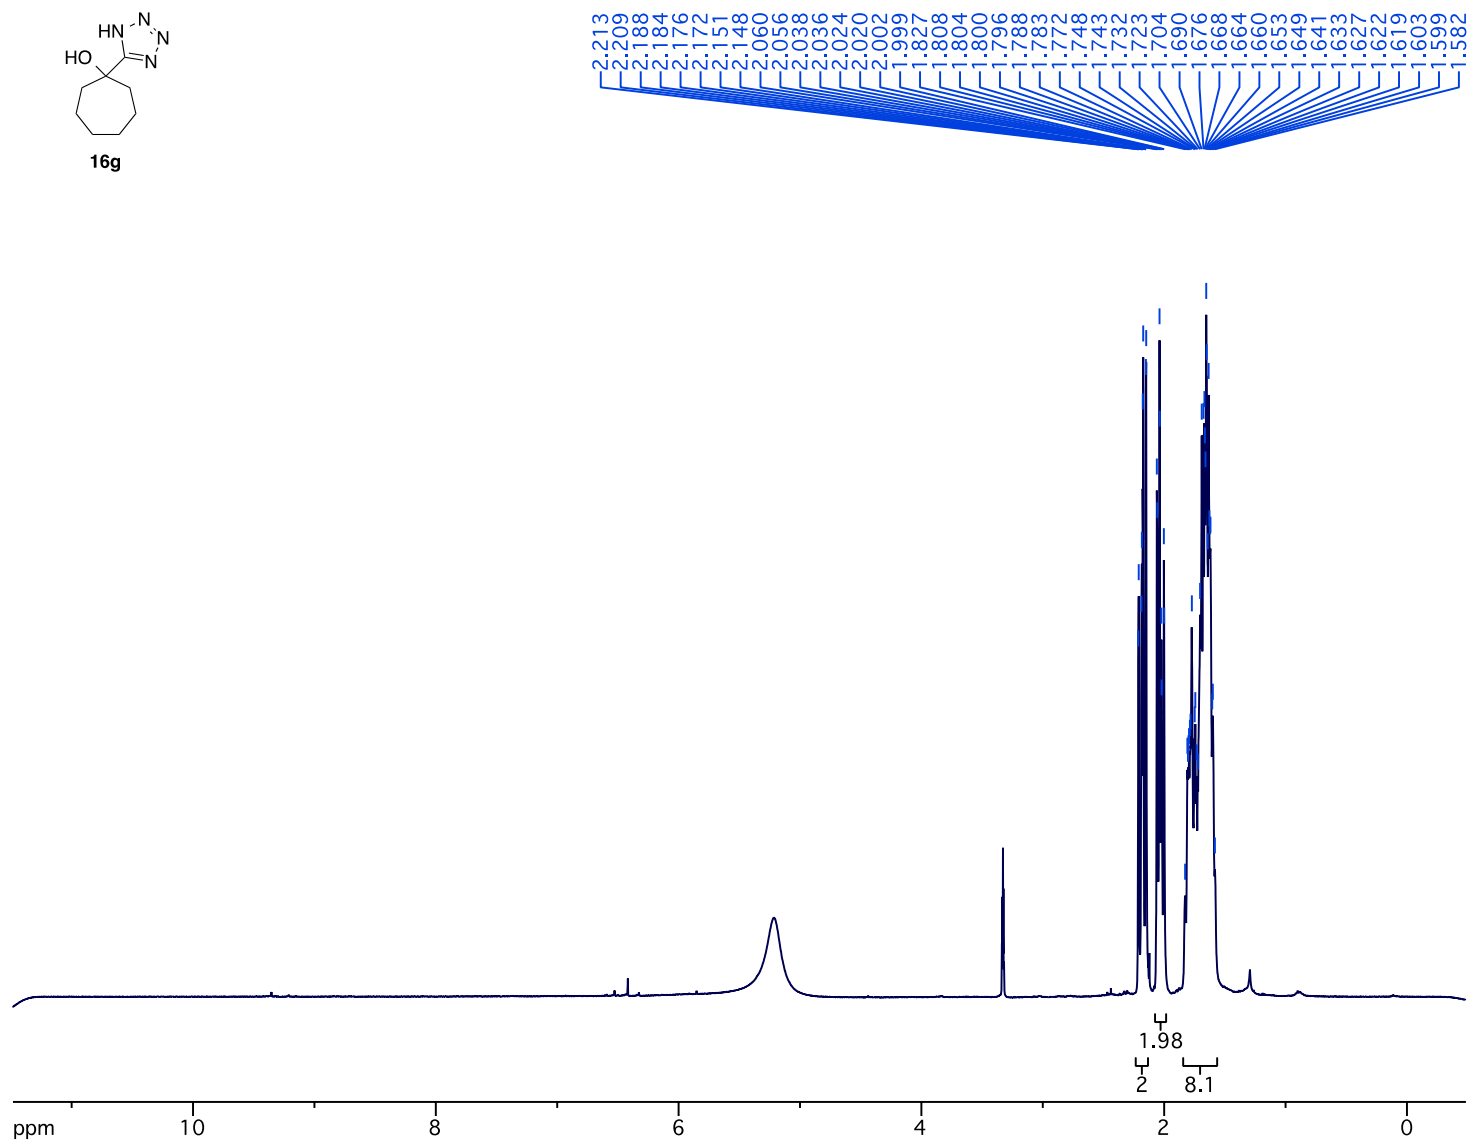

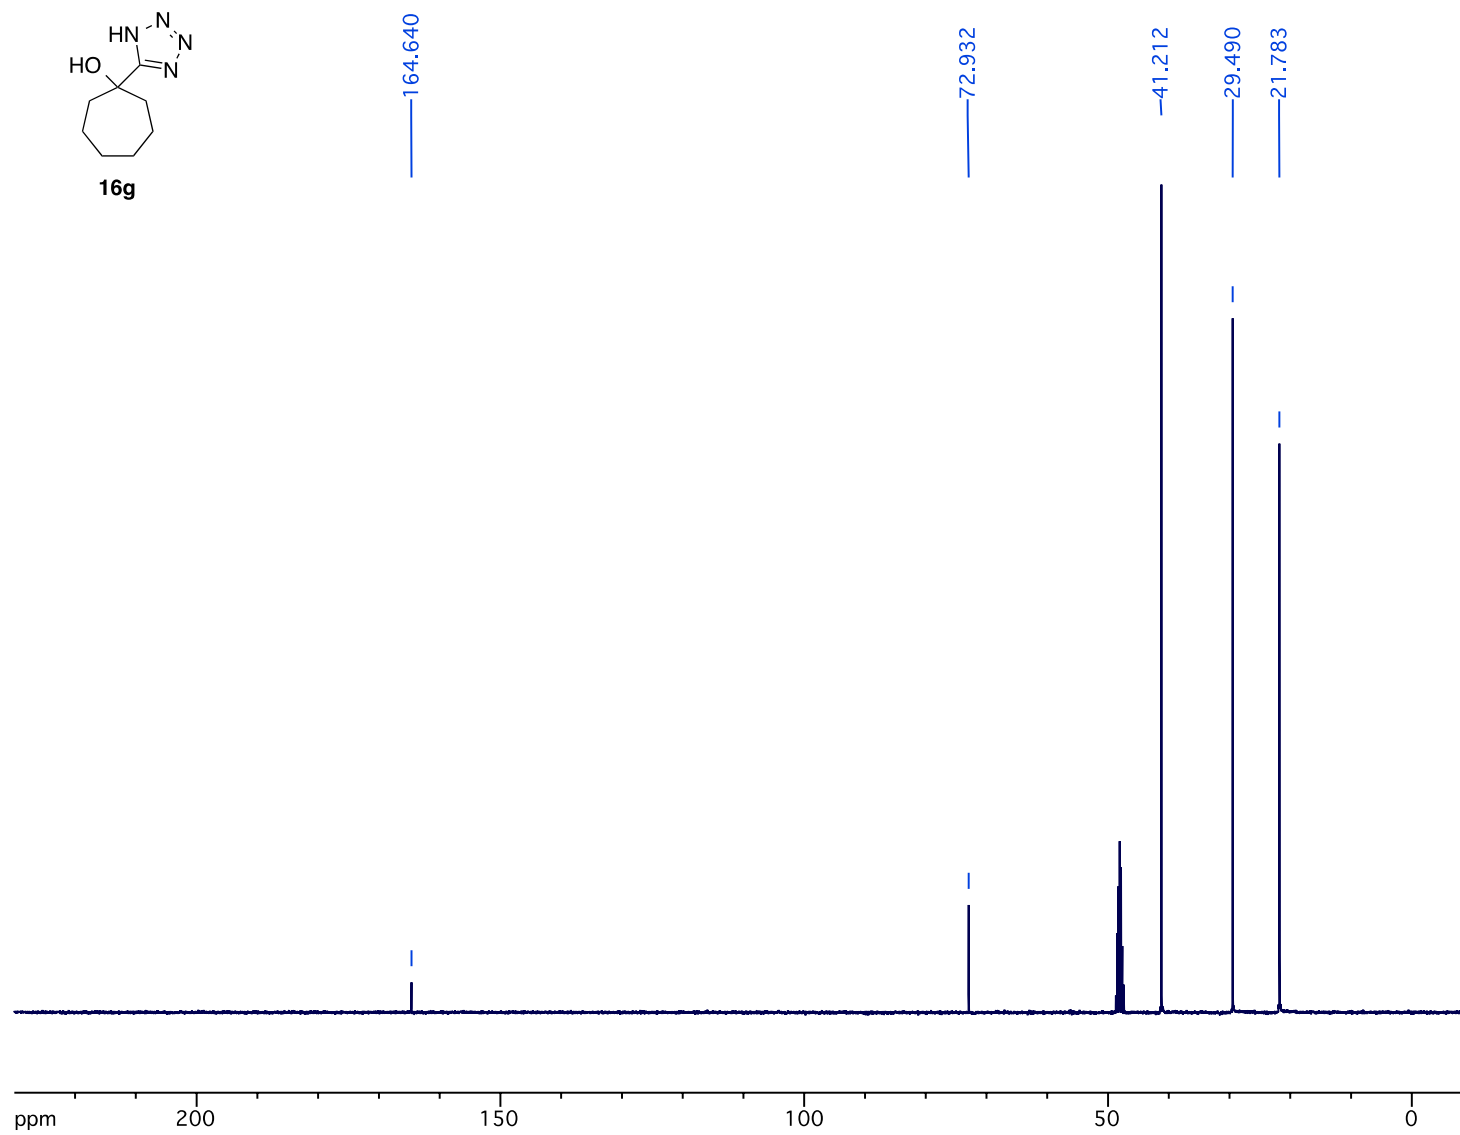

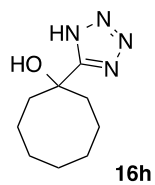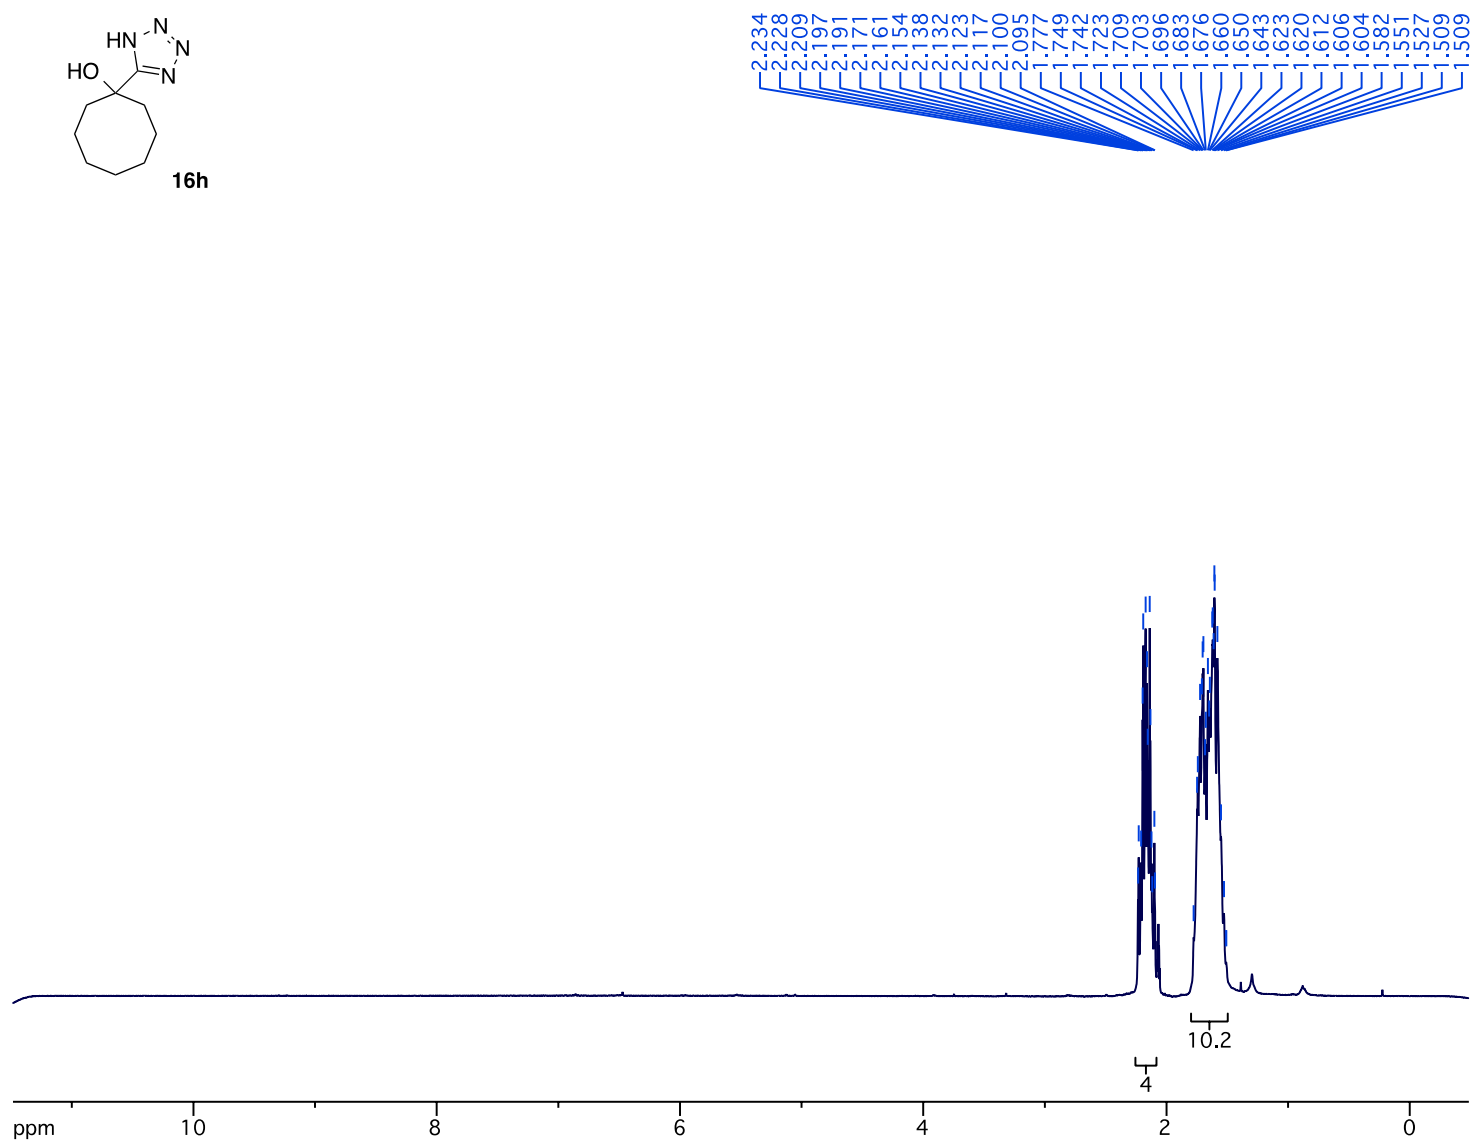

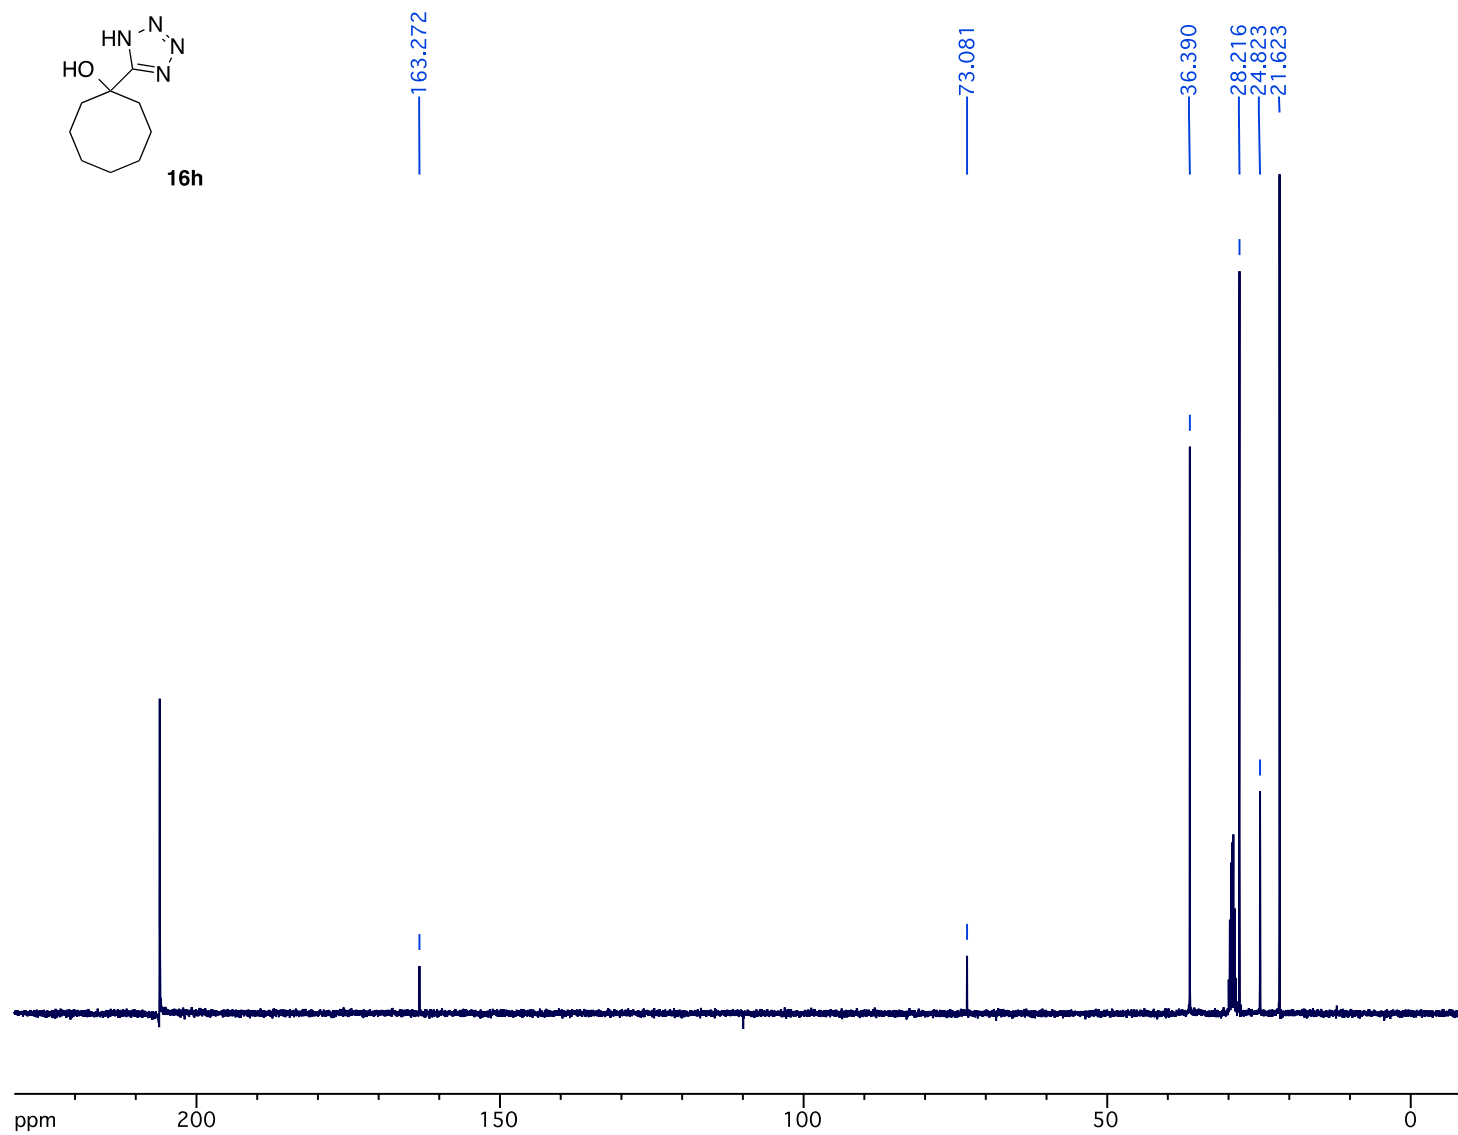

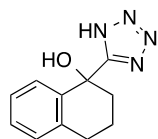**16i**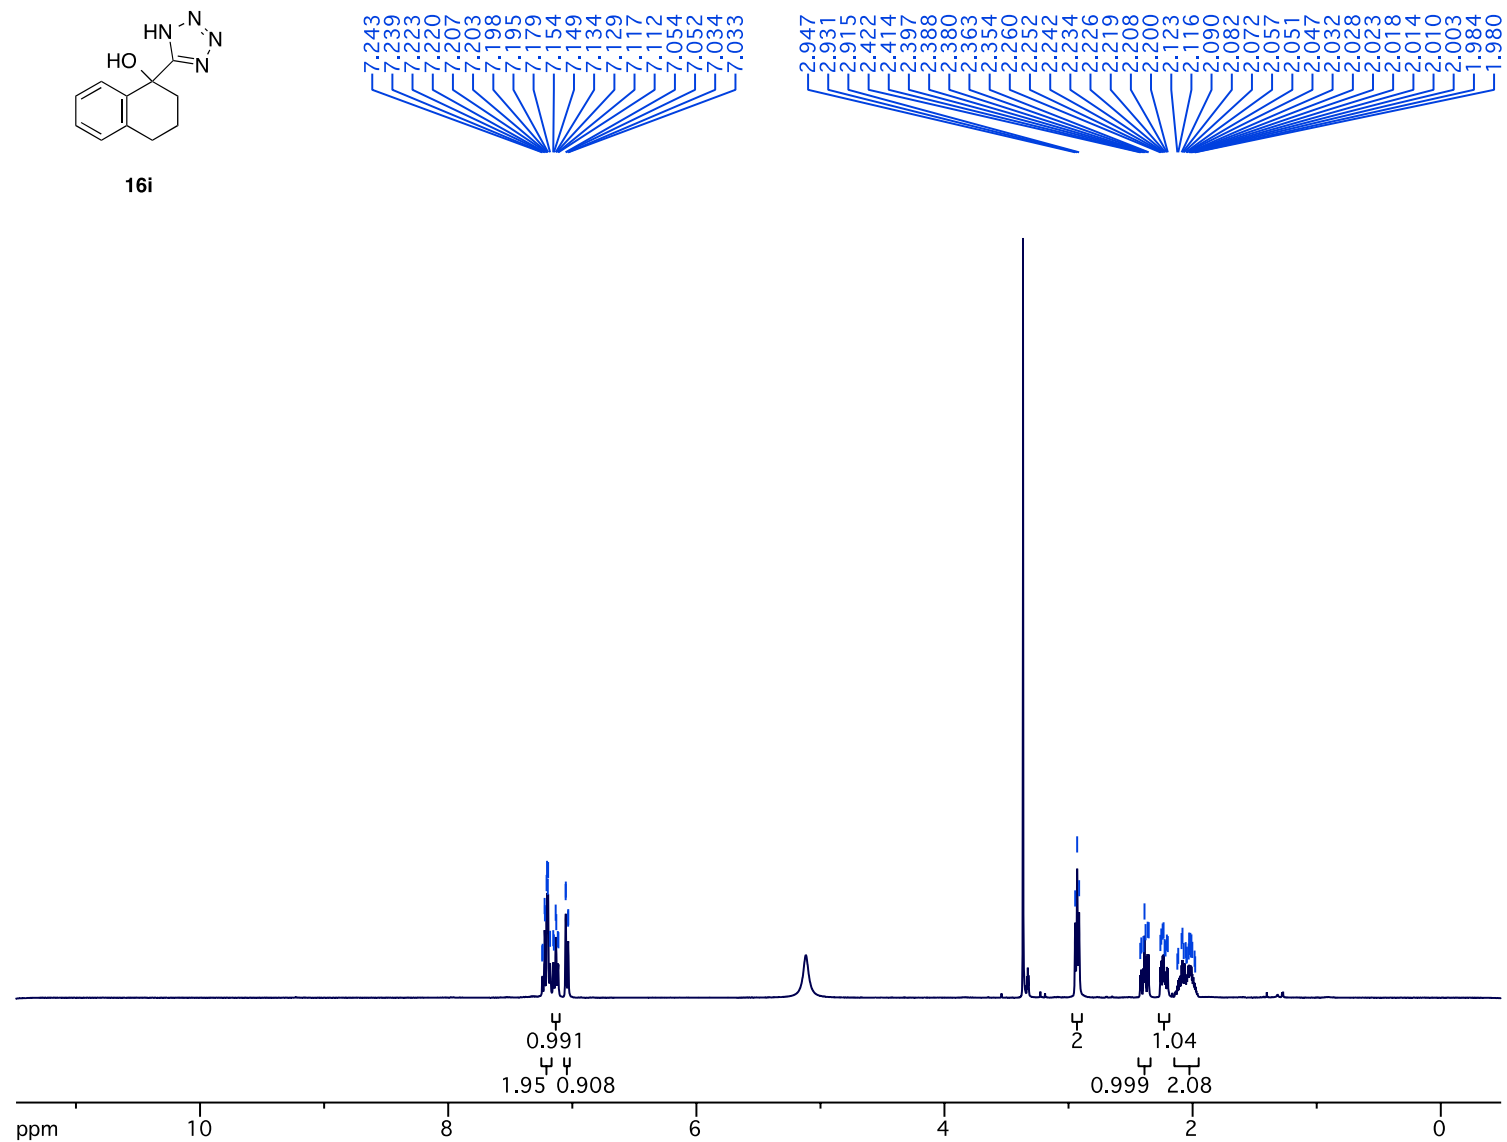

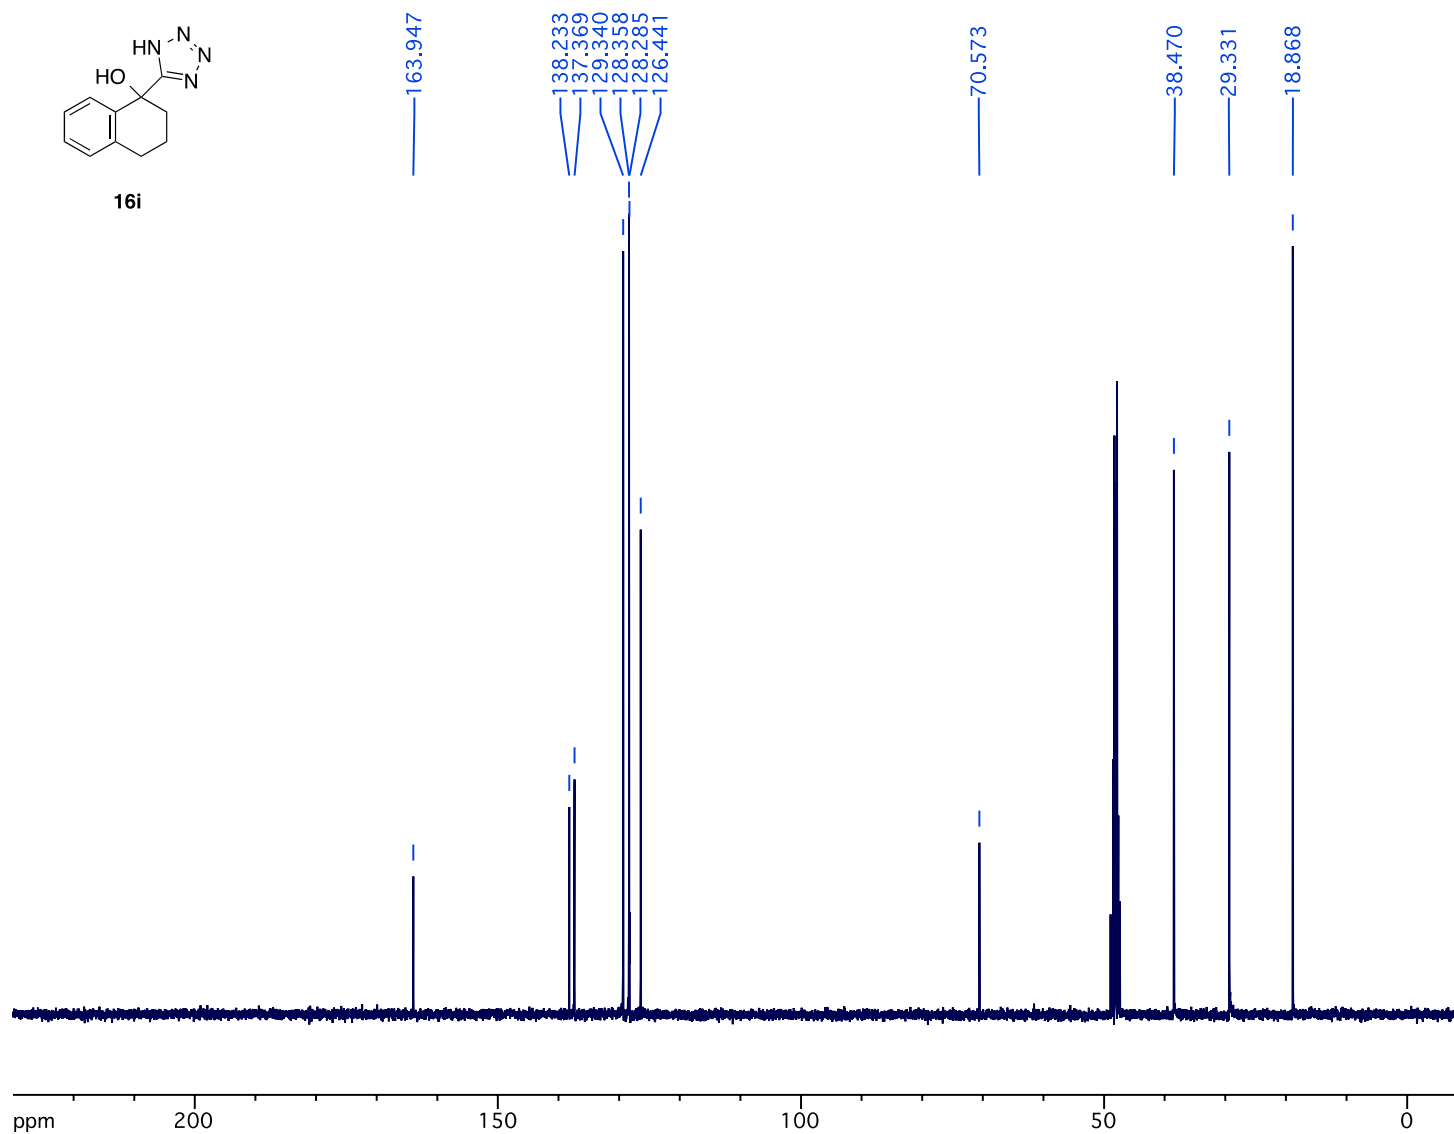

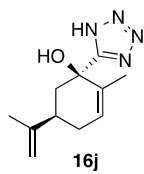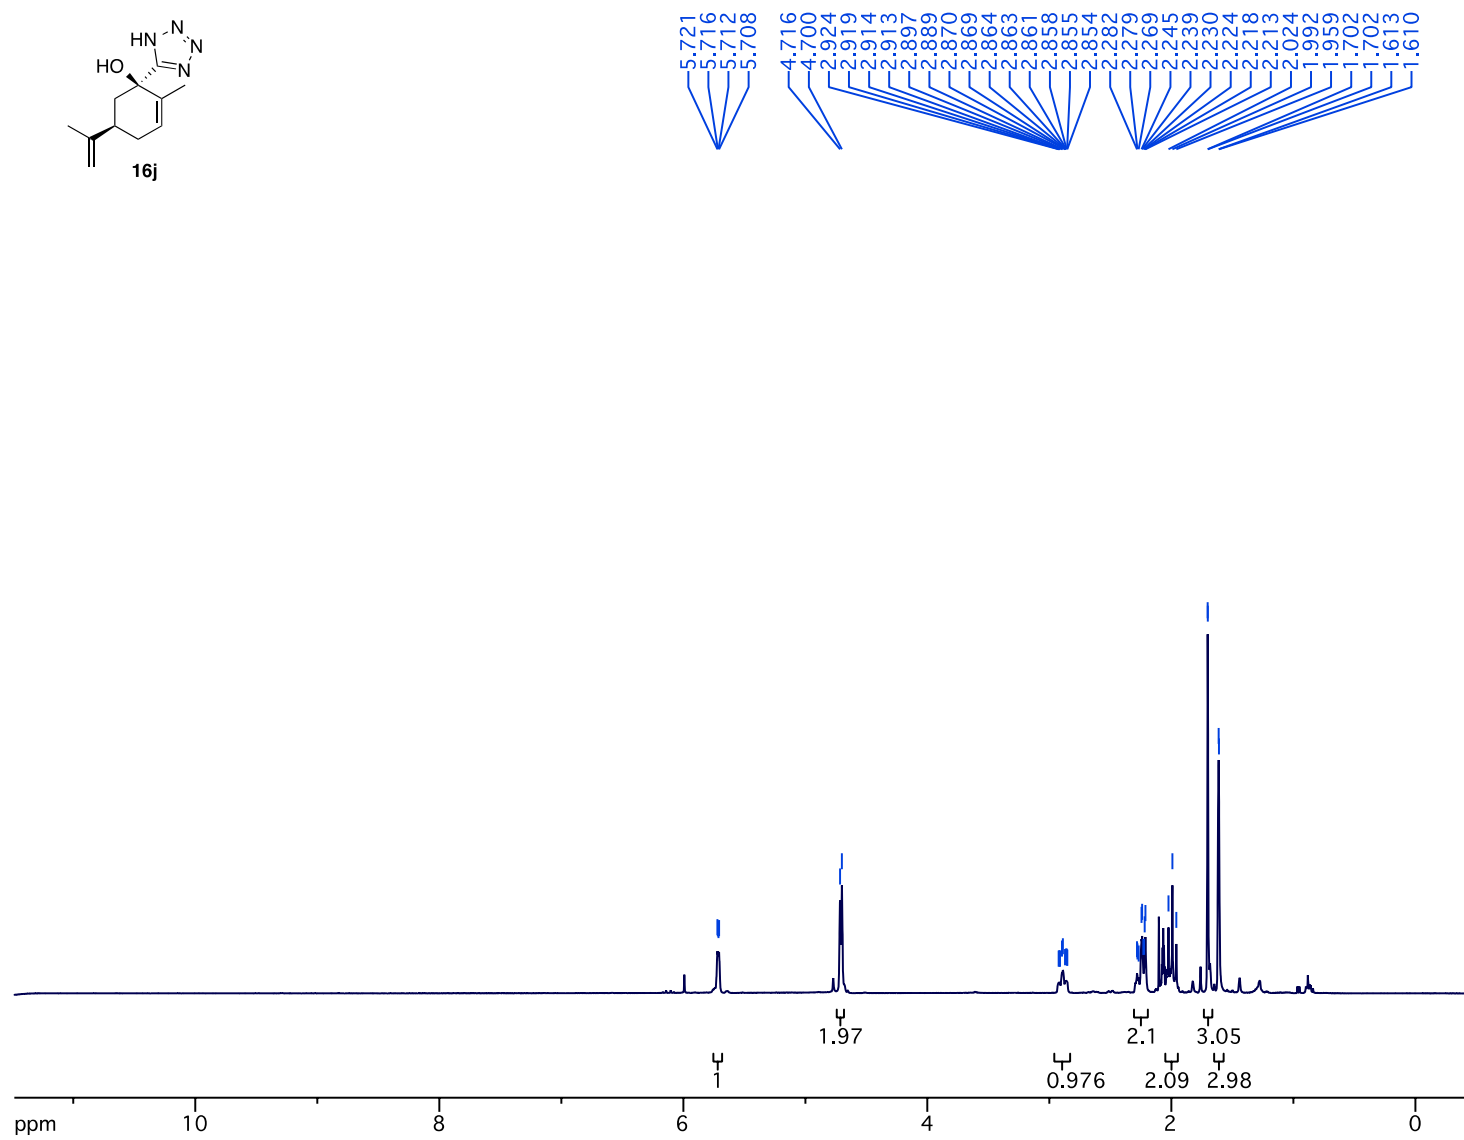



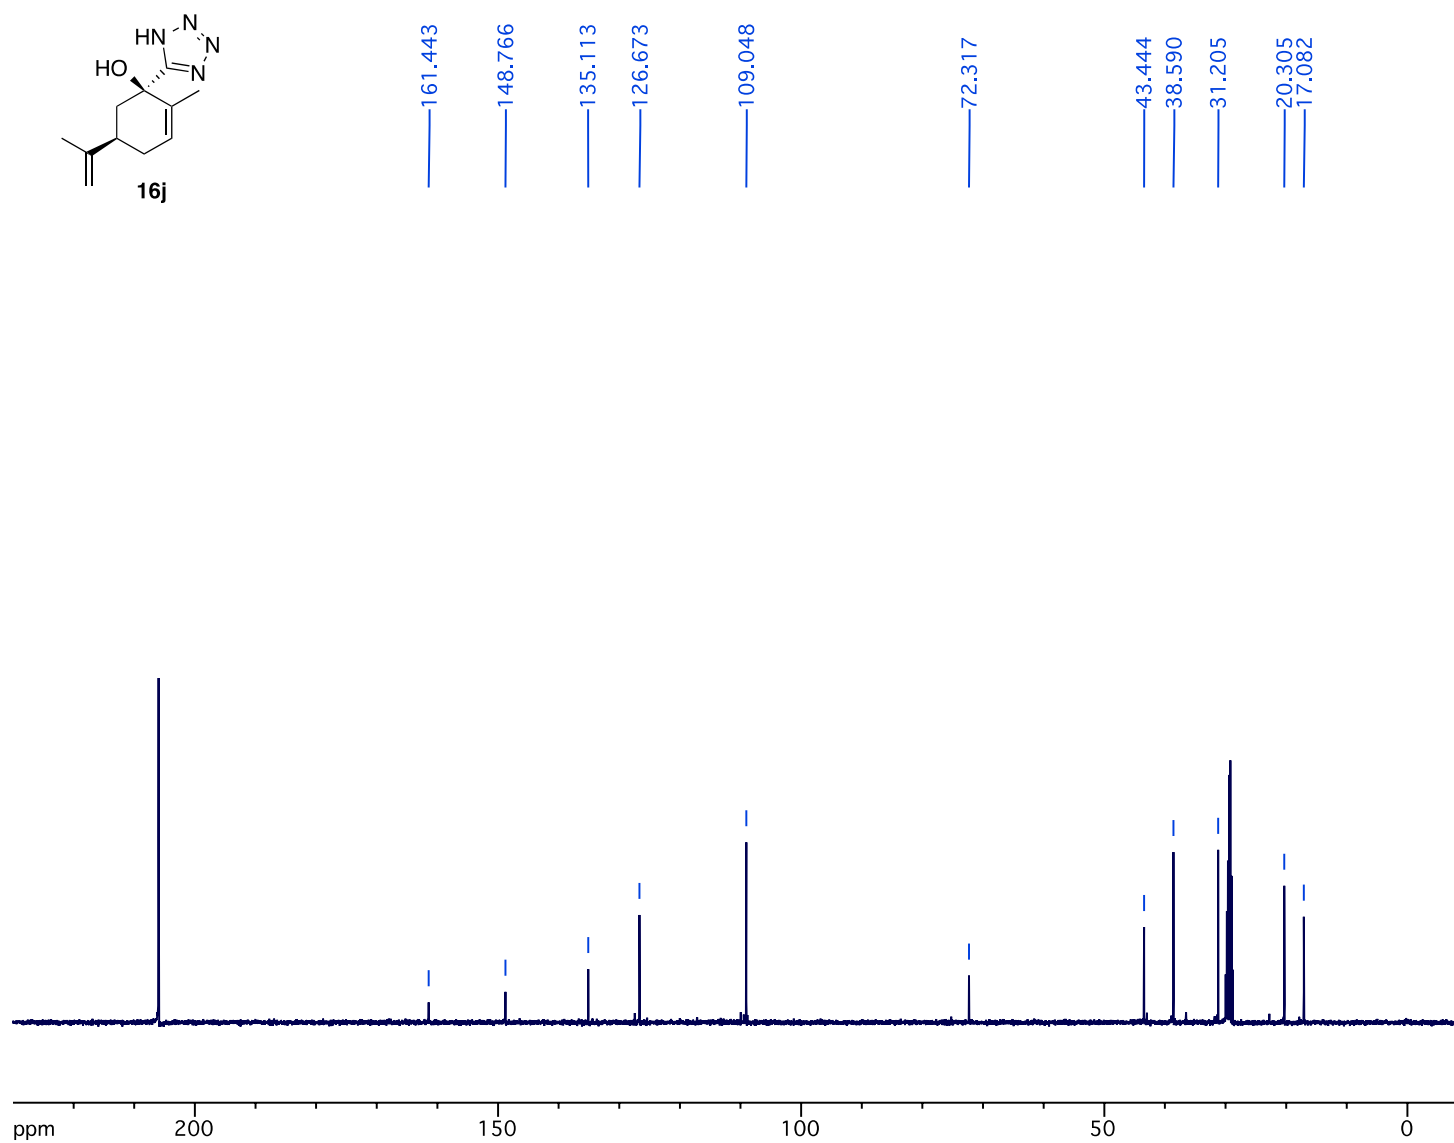

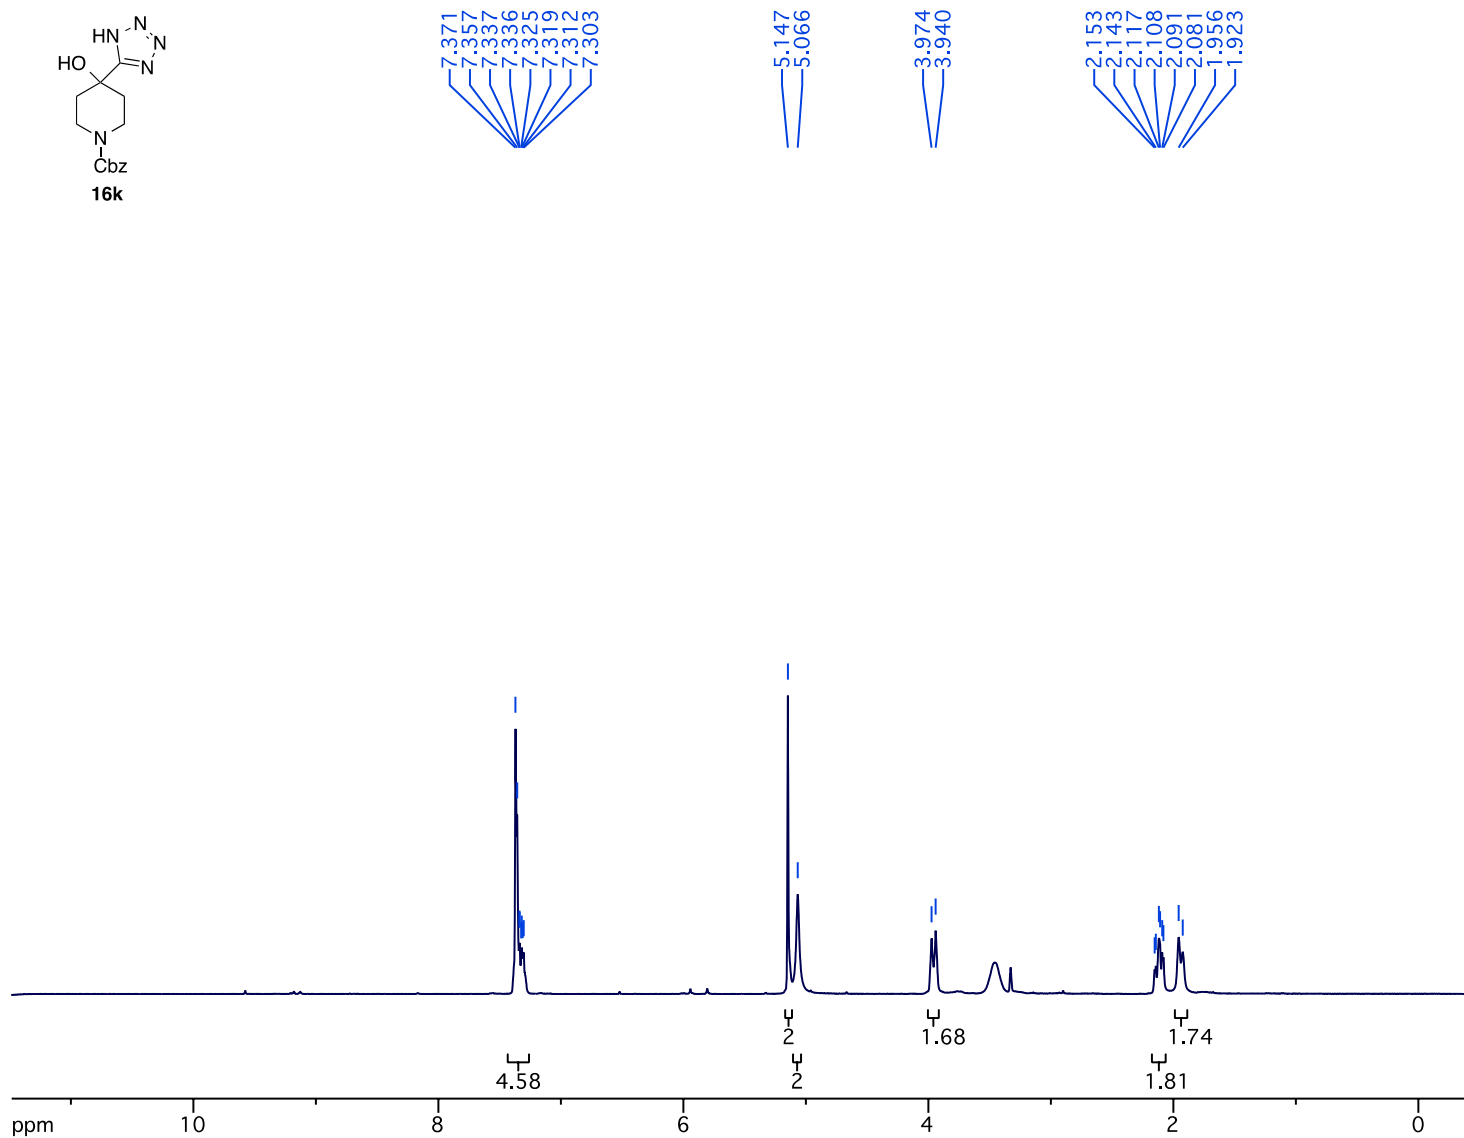

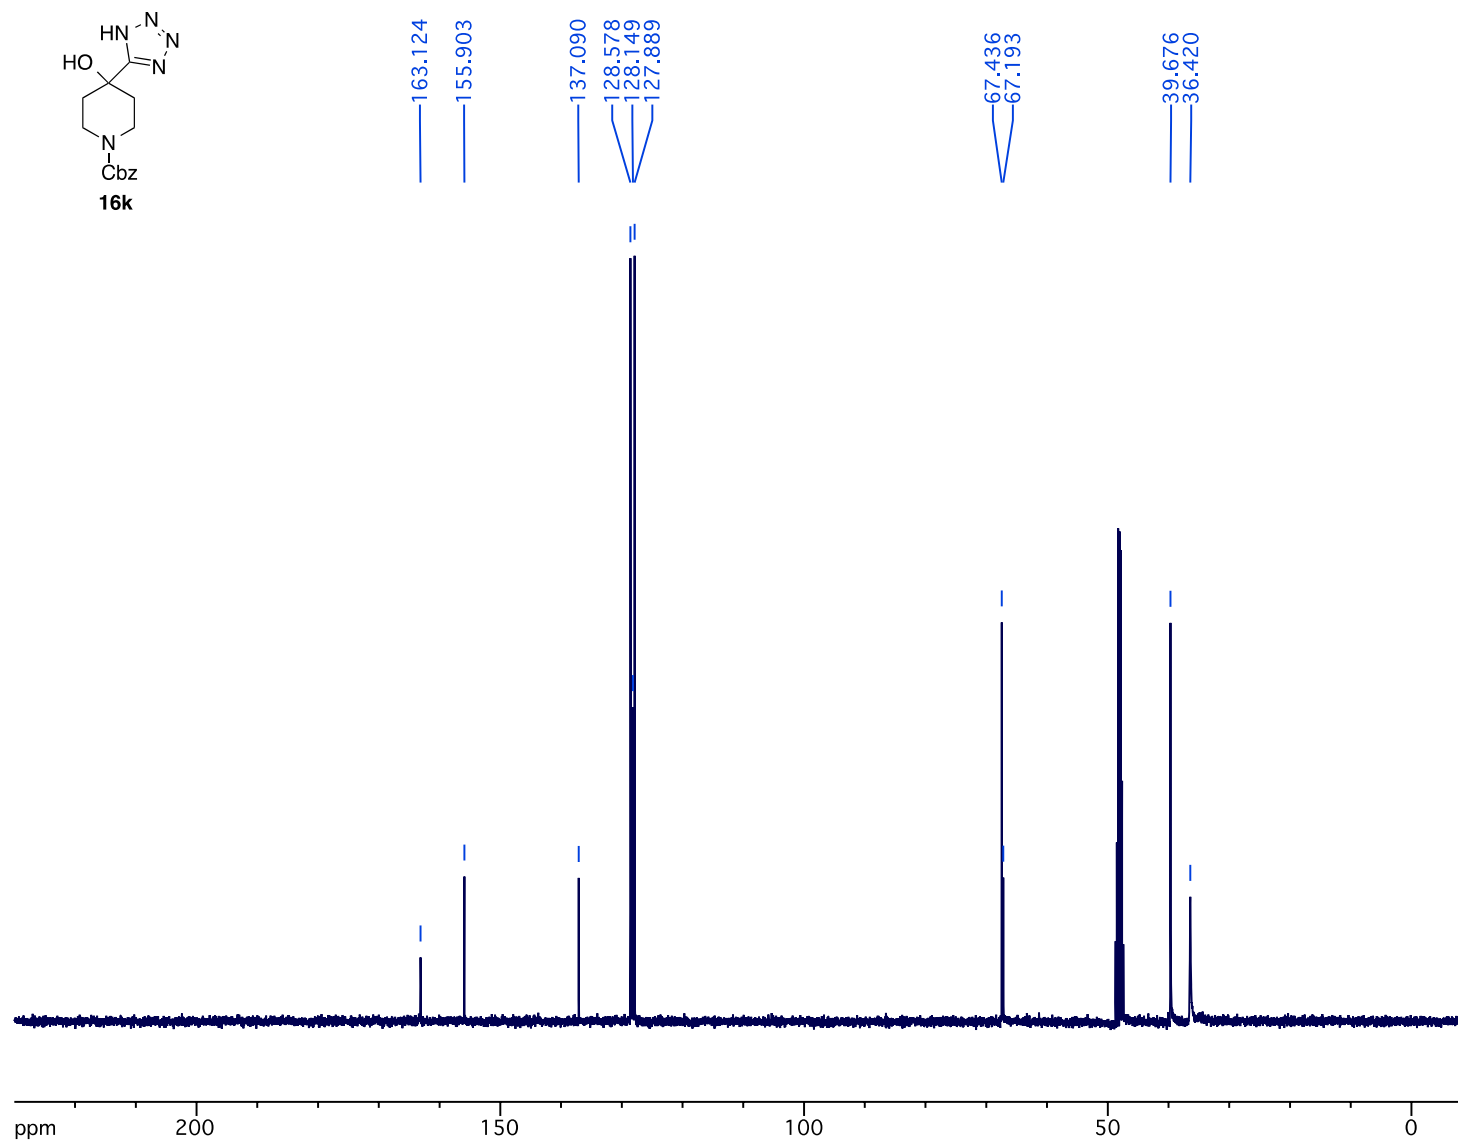

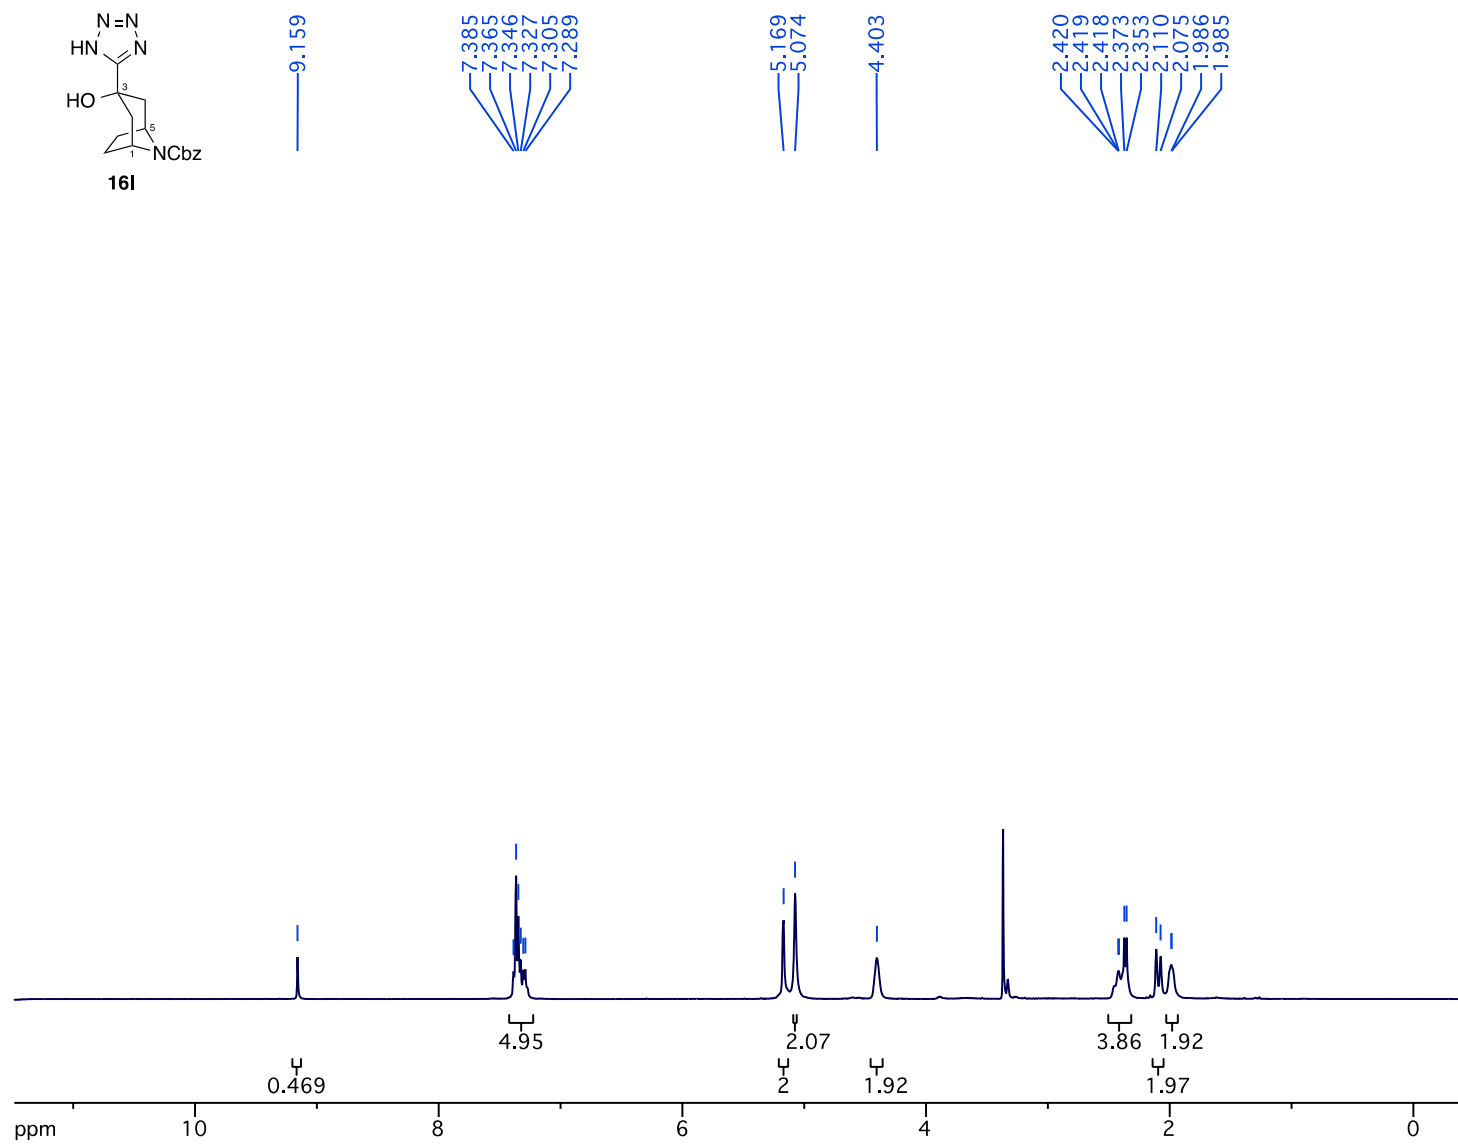

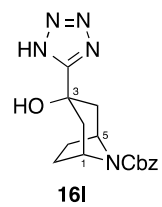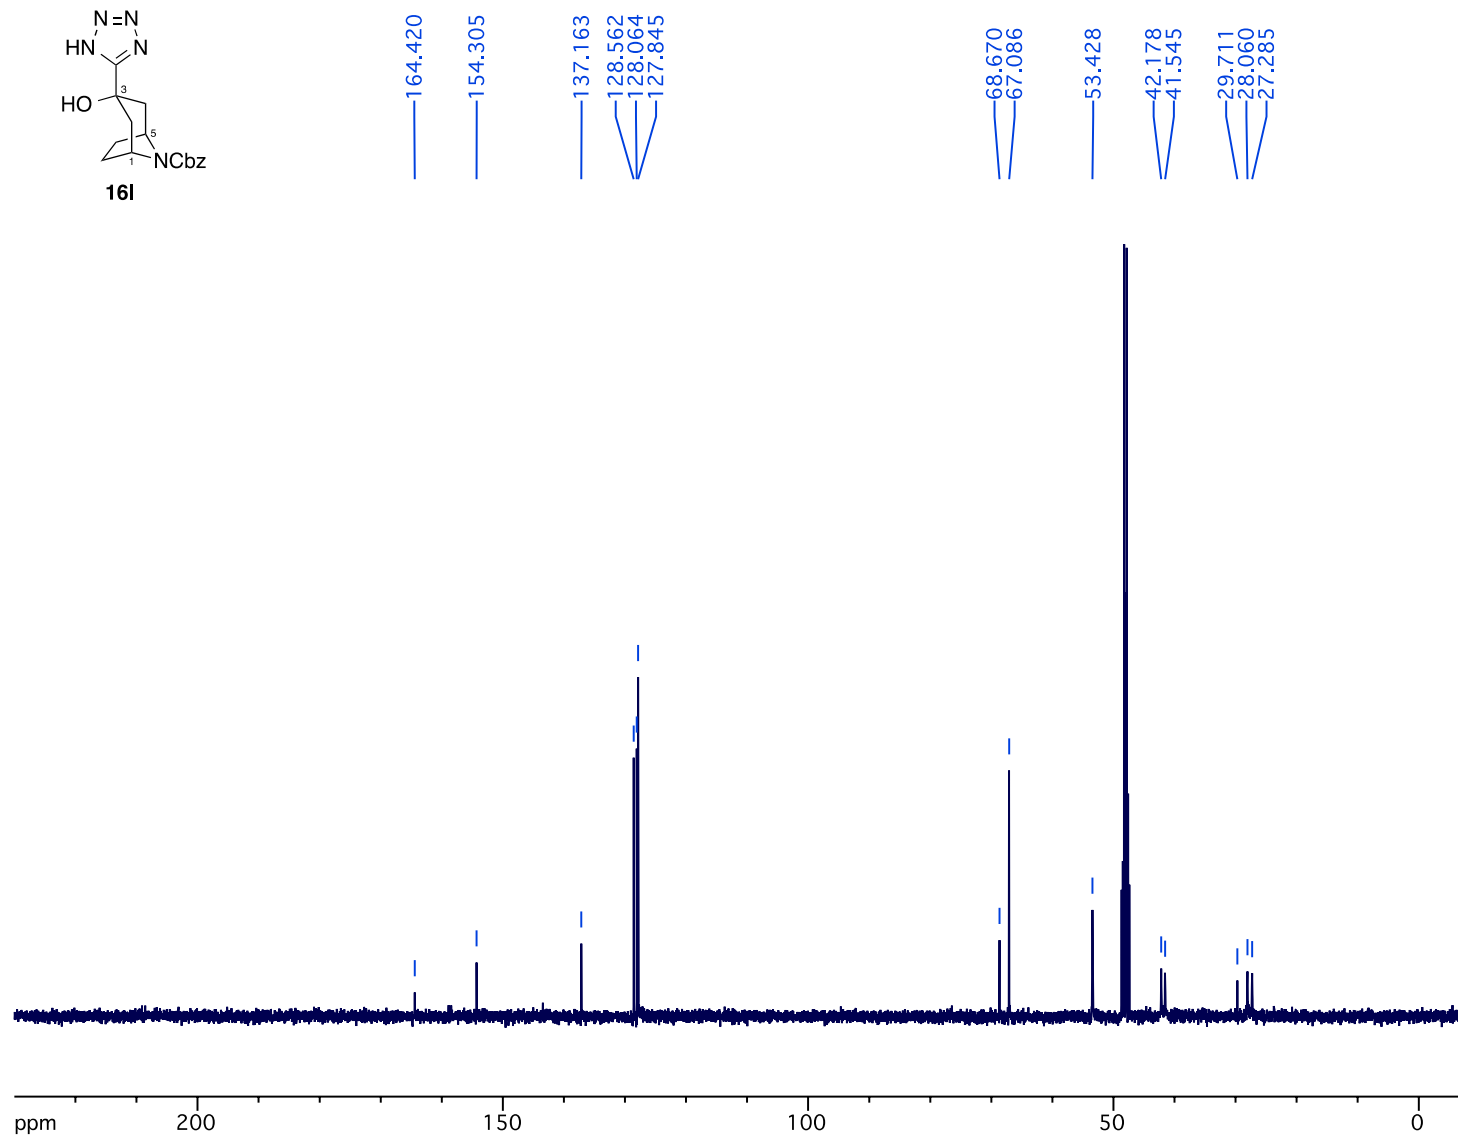

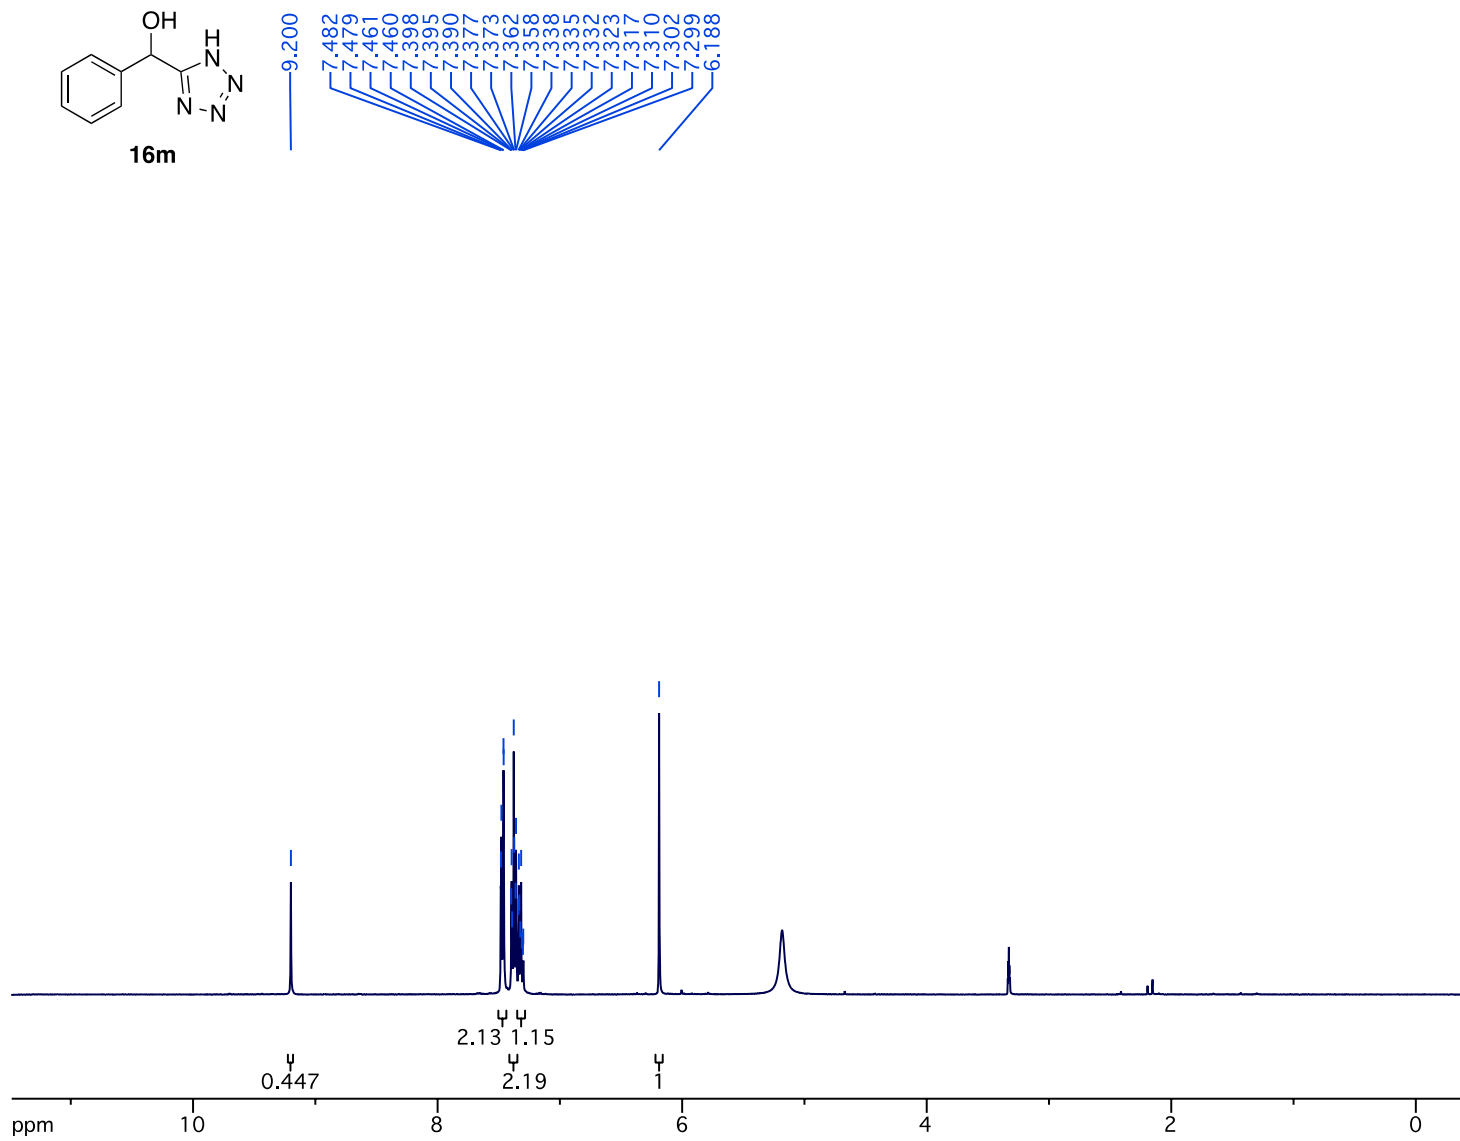

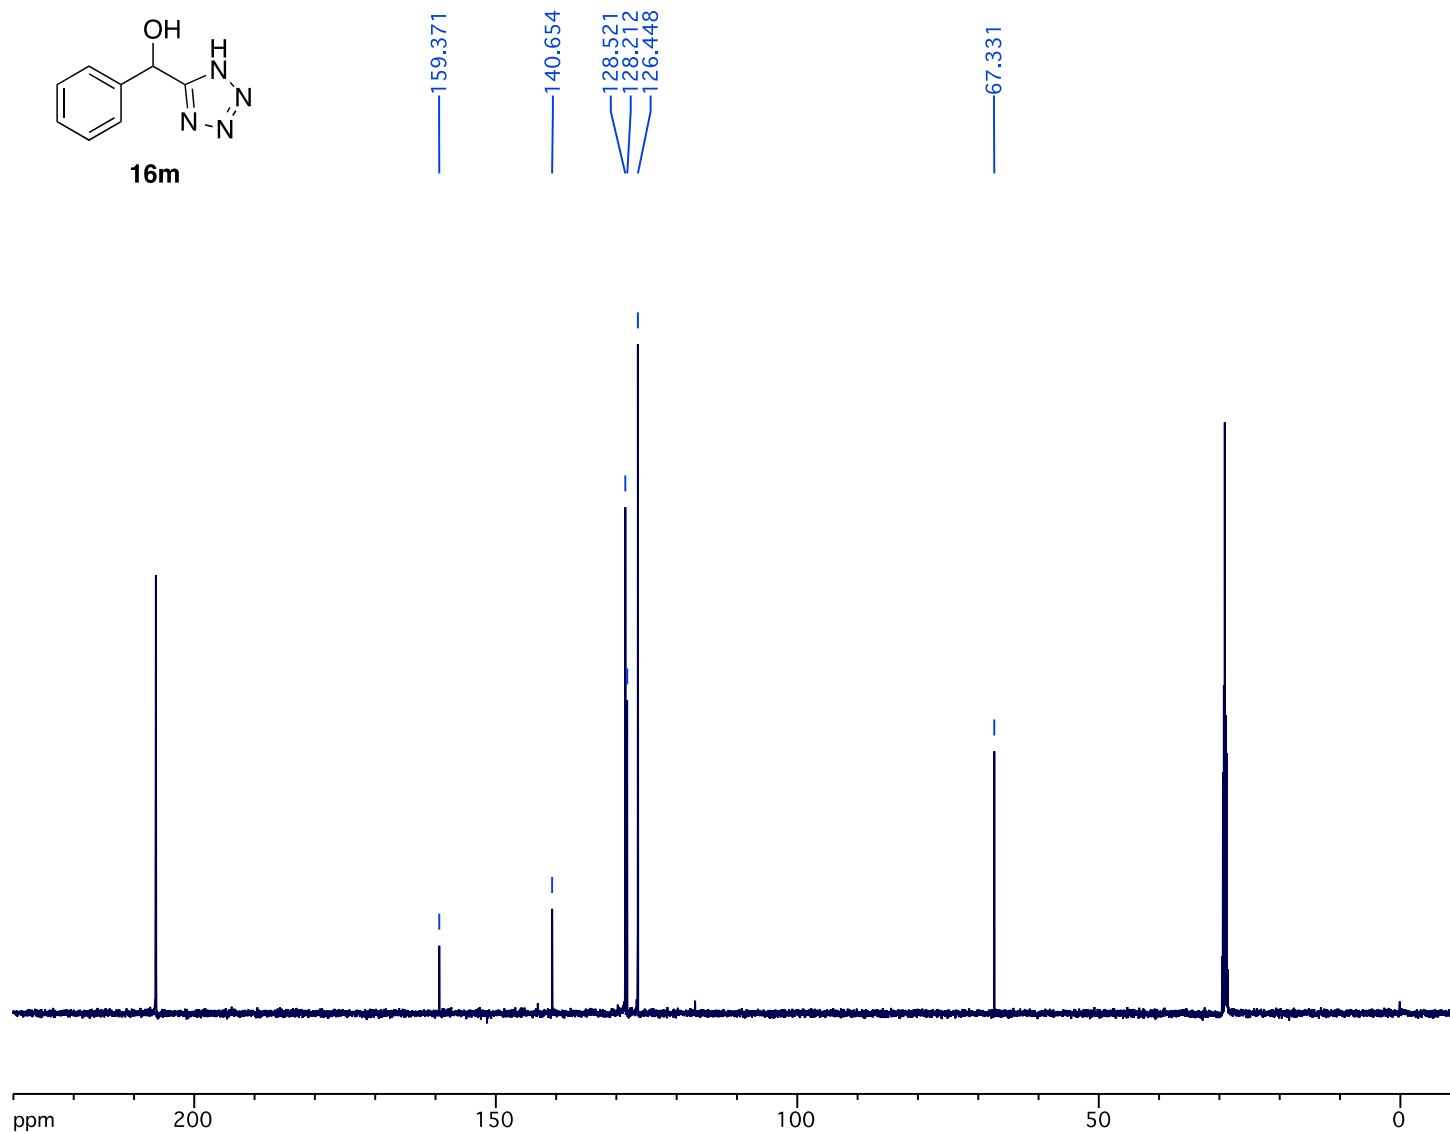

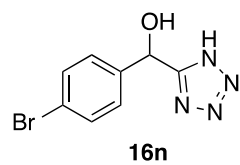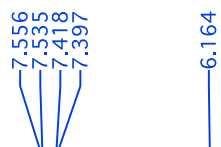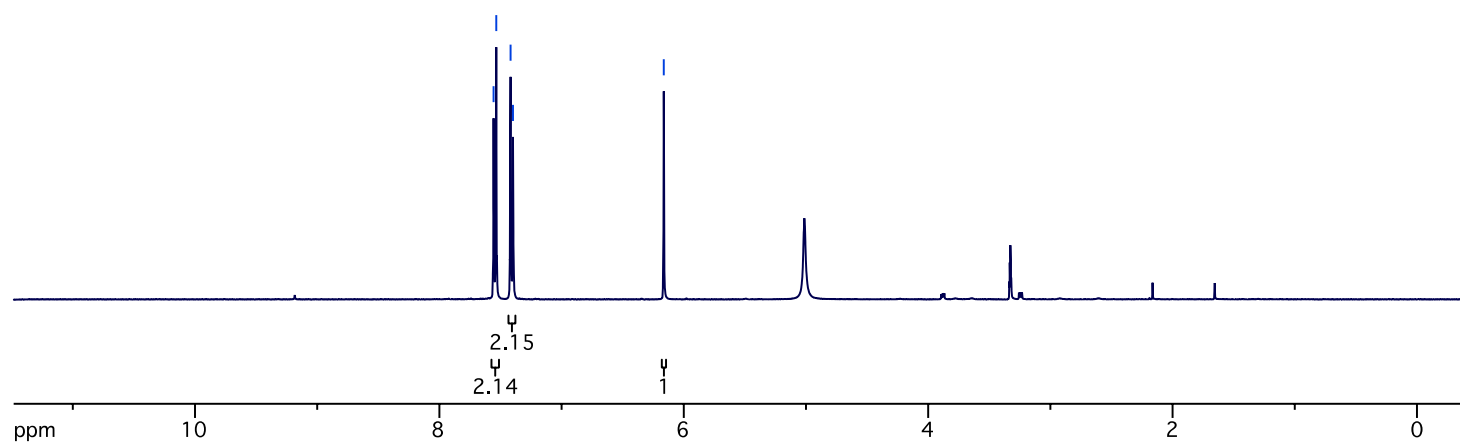



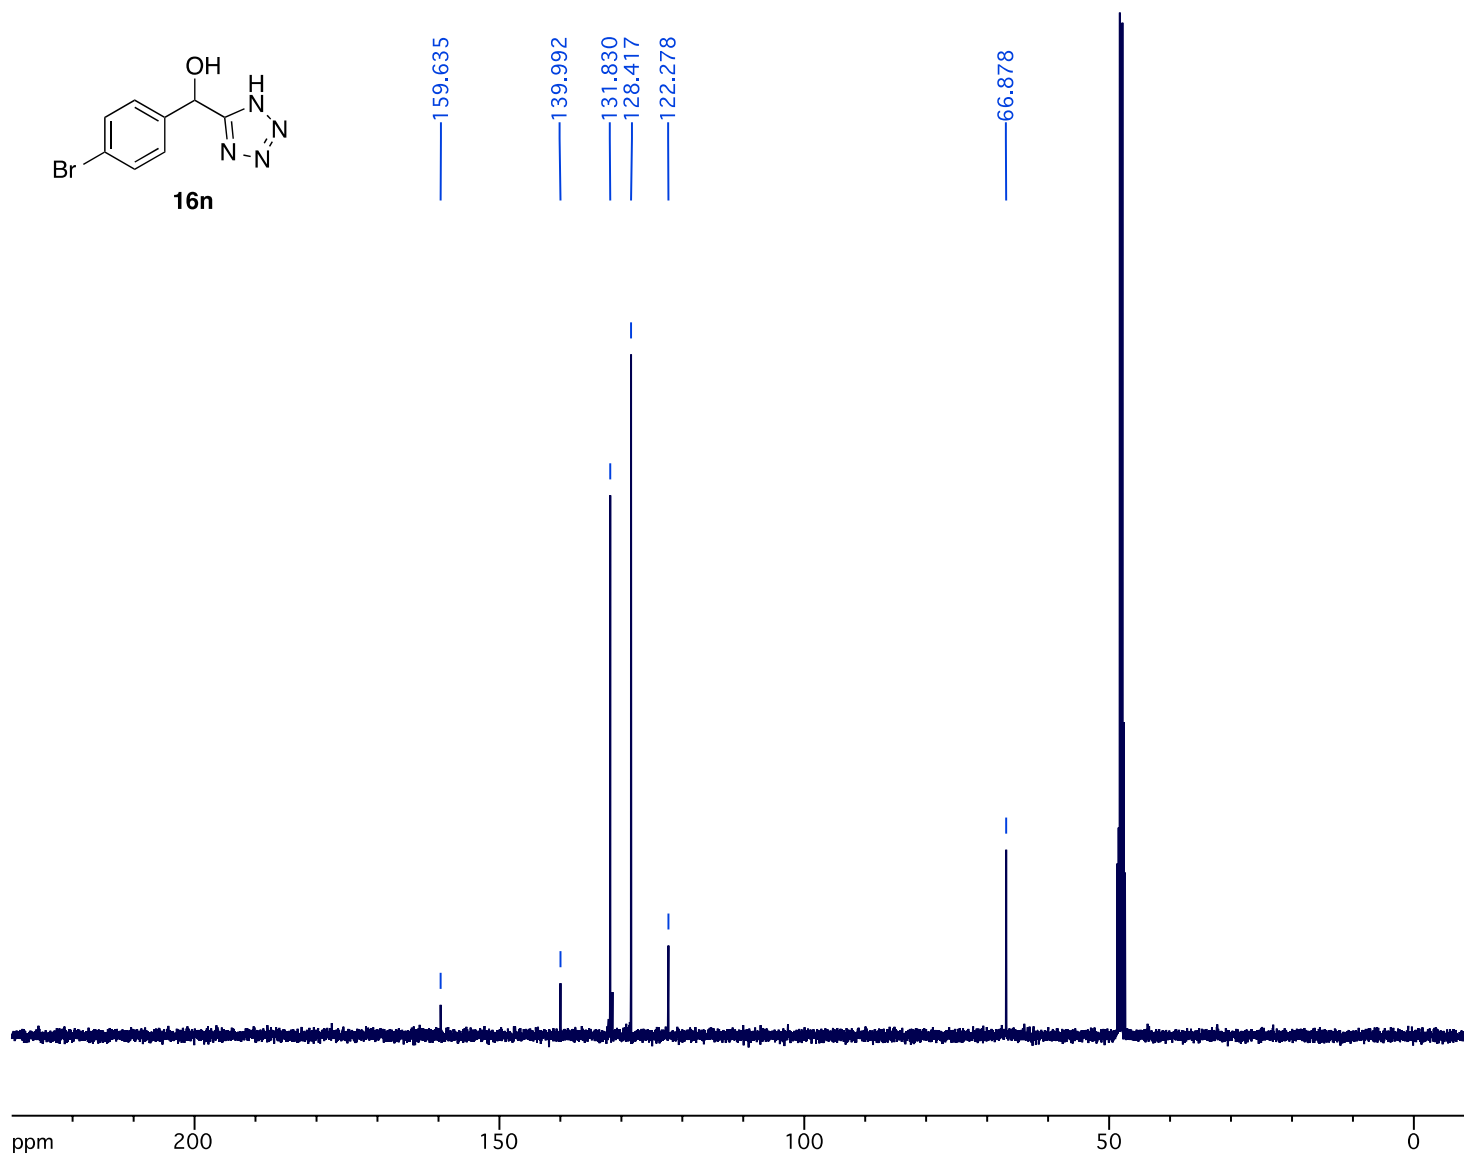

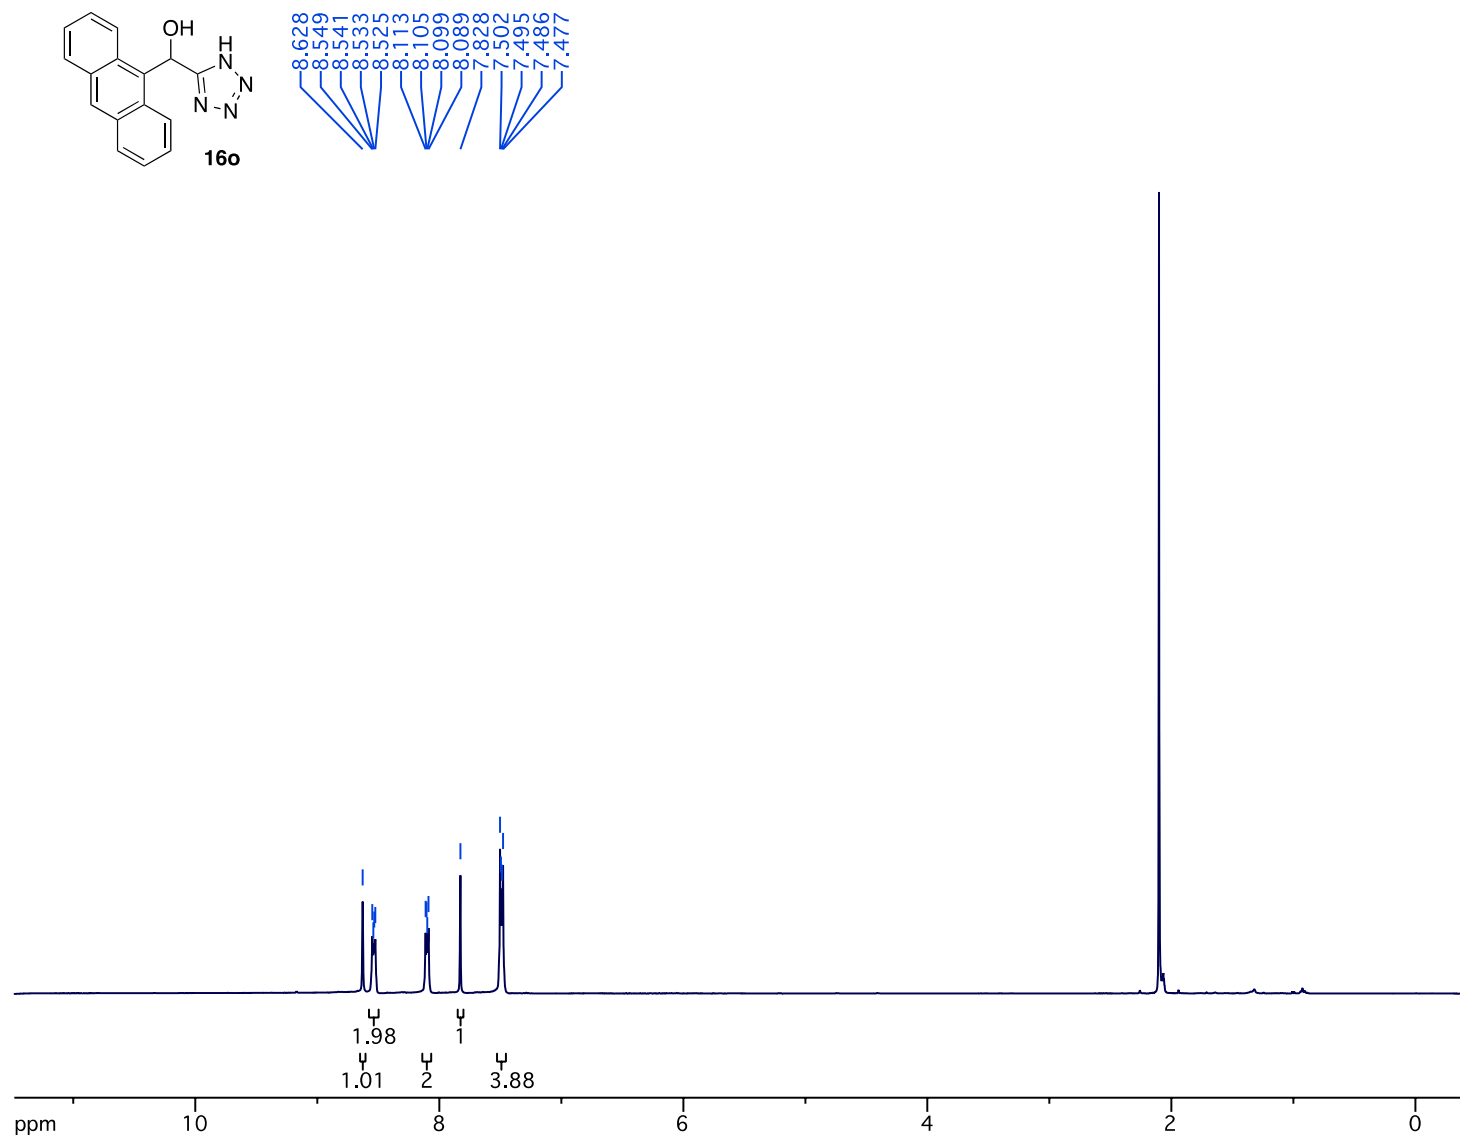

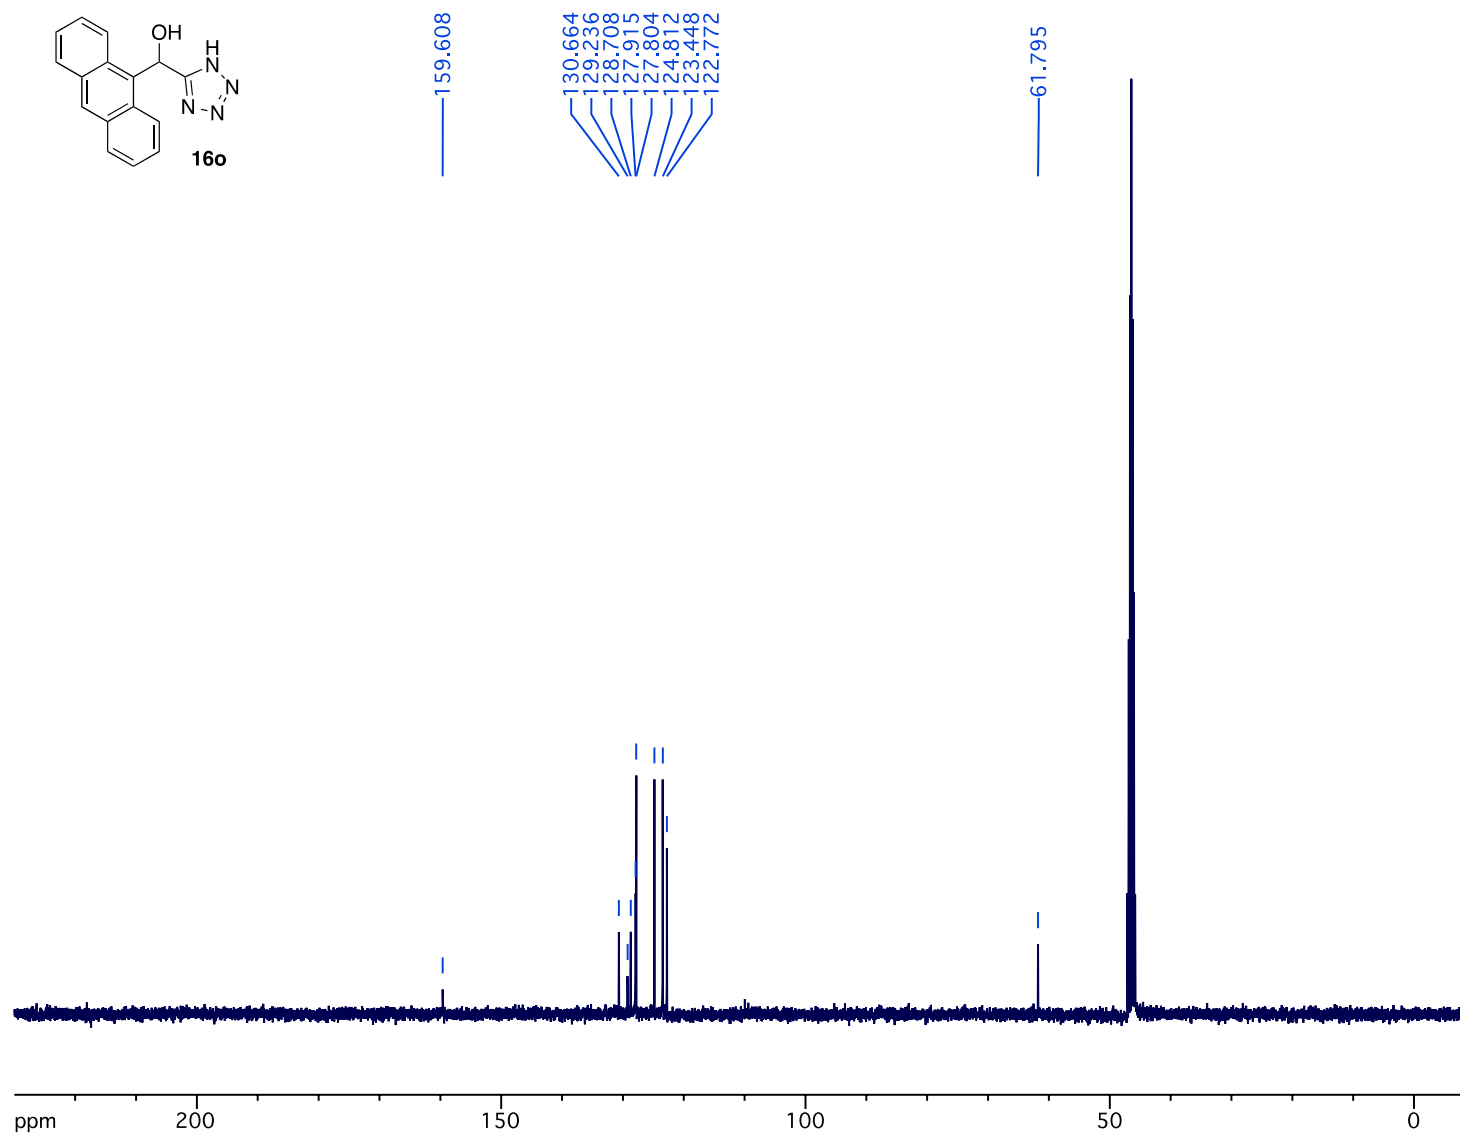

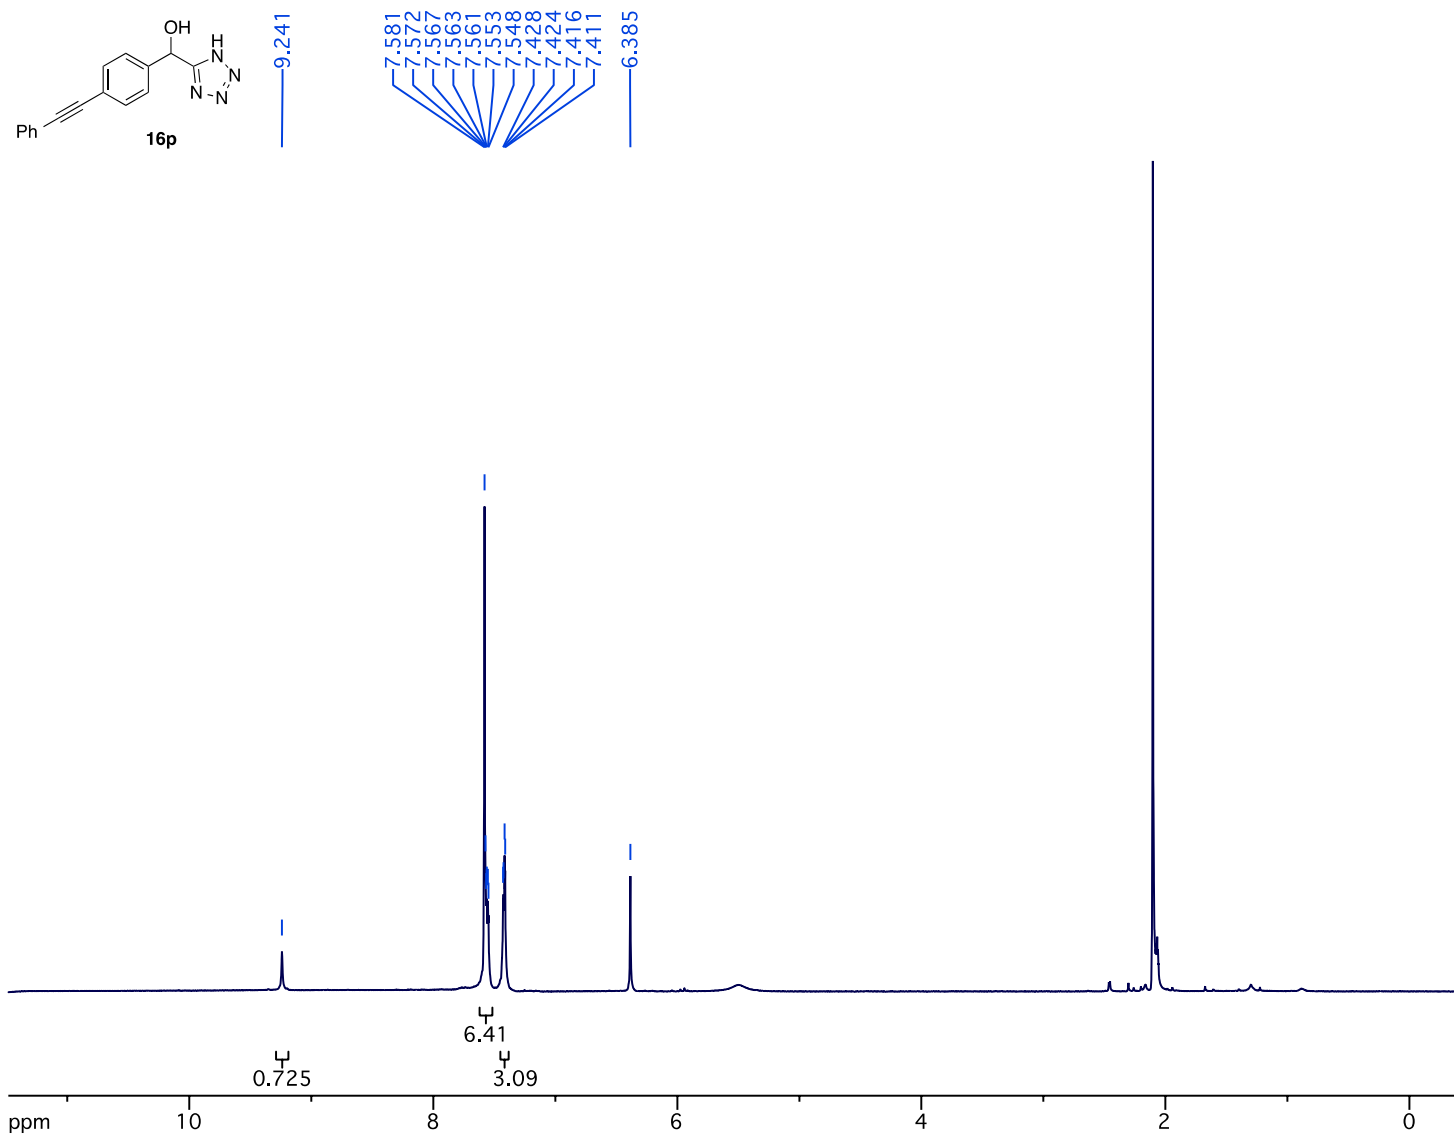

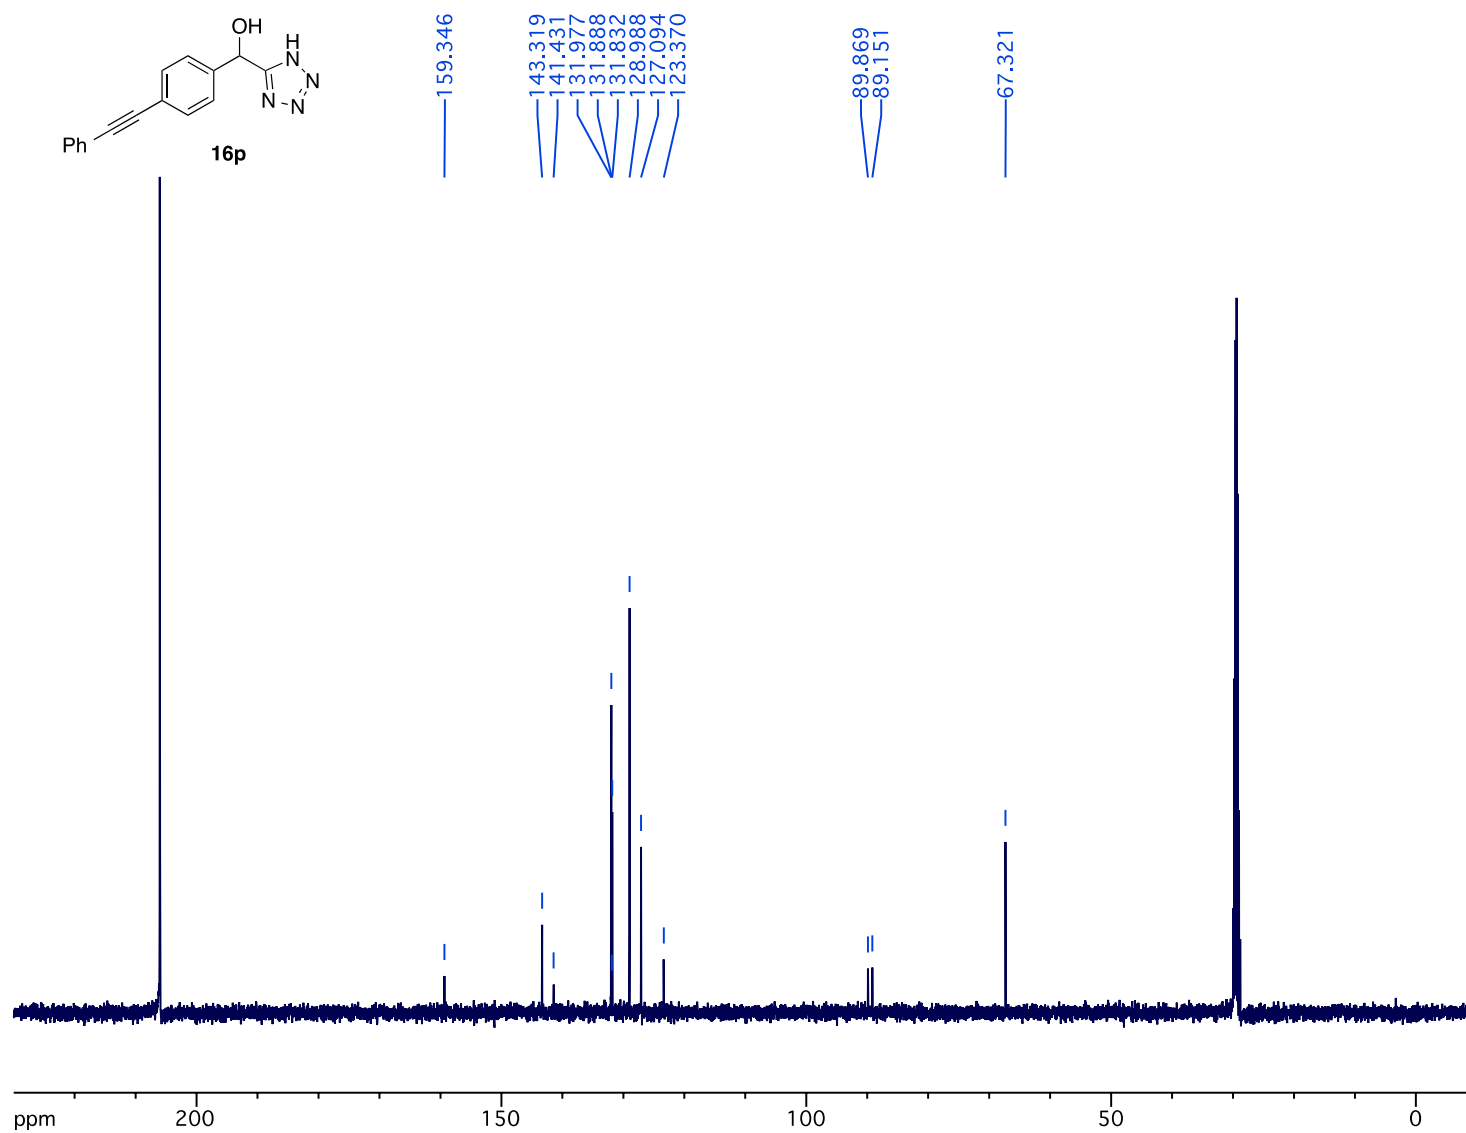

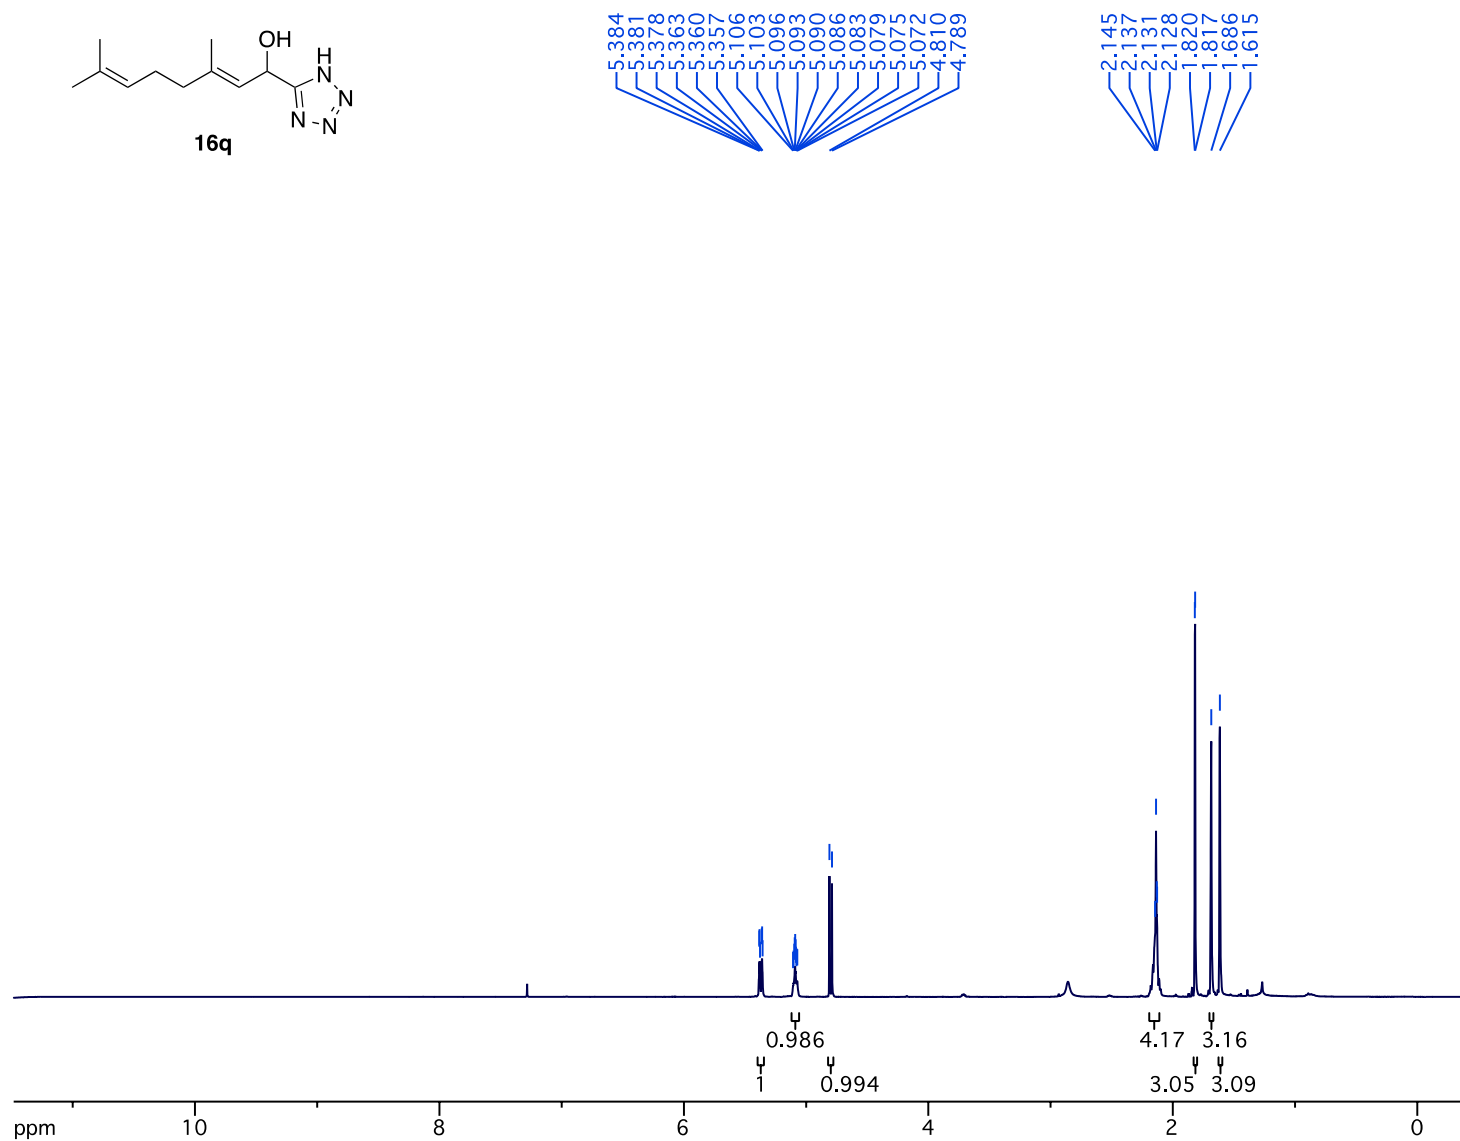

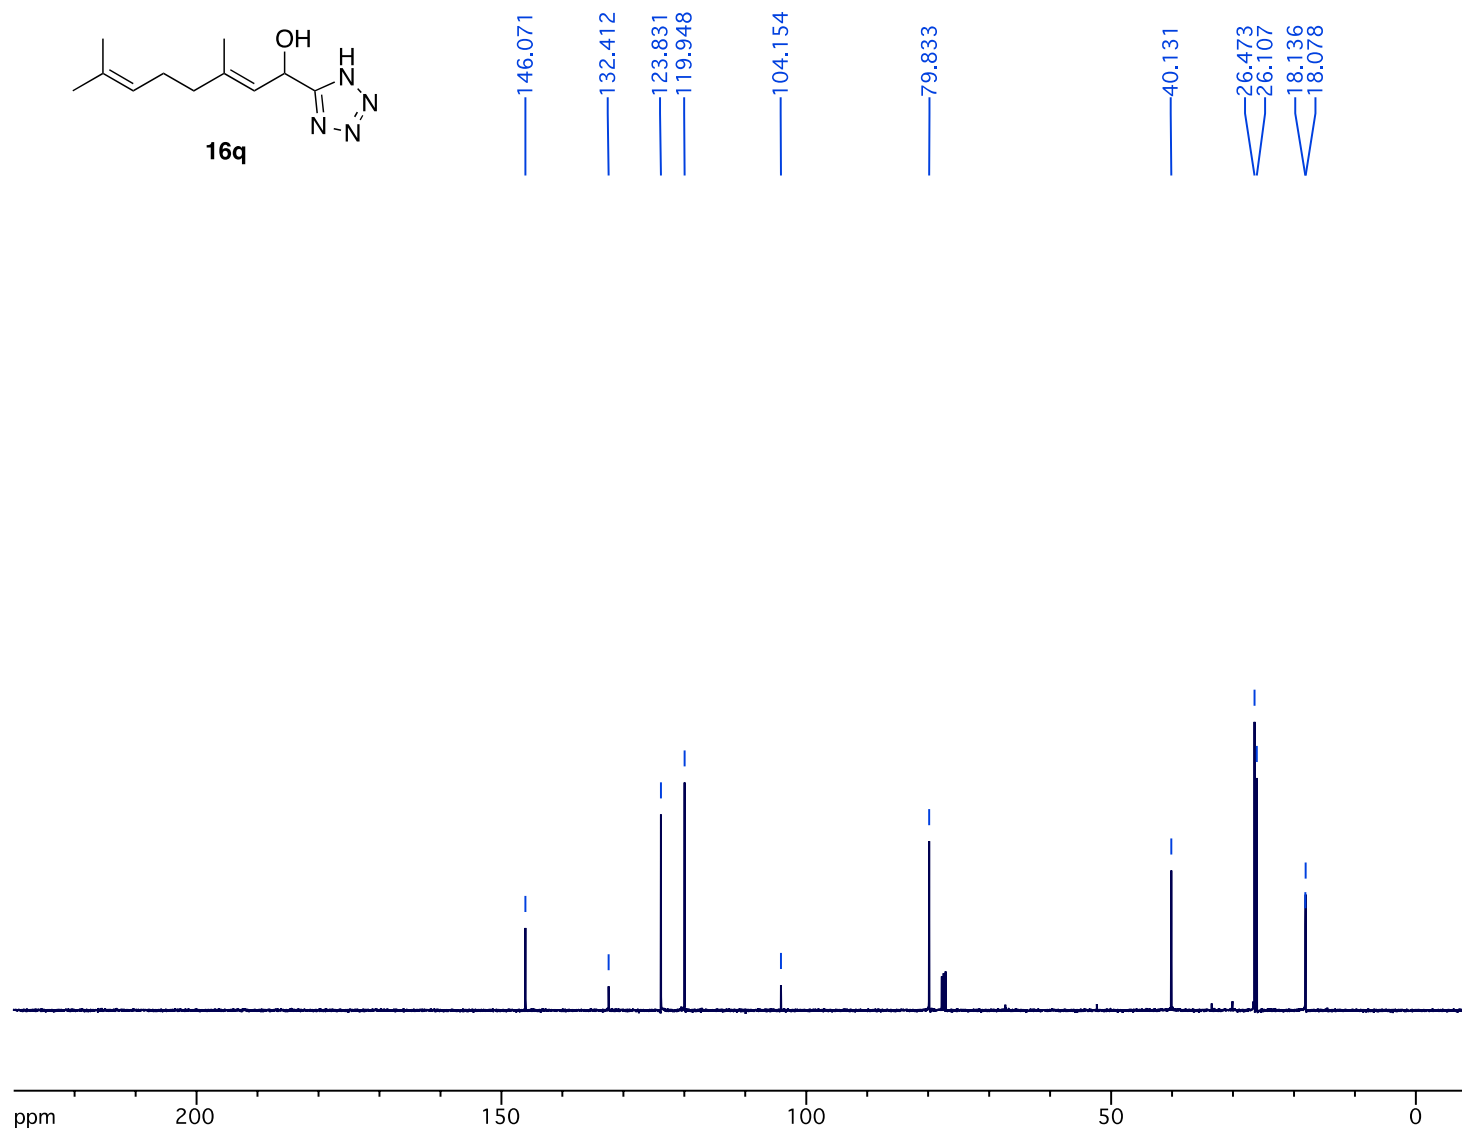

Supplement: Supplementary file 1 [file 17670854]
